# Supplementary material
Source: PubMed Central journal article supplement (PMC3359705)
Supplement: NIHMS334878-supplement-1_si_001.pdf [file NIHMS334878-supplement-1_si_001.pdf]

Supporting Information for

**Bi(OTf)<sub>3</sub>-, TfOH-, and TMSOTf-Mediated, One-Pot Epoxide Rearrangement, Addition and Intramolecular Silyl-Modified Sakurai (ISMS) Cascade Toward Dihydropyrans: Comparison of Catalysts and Role of Bi(OTf)<sub>3</sub>.**

R. Frederick Lambert, Robert J. Hinkle,\* Stephen E. Ammann, Yajing Lian, Jia Liu, Shane E. Lewis and Robert D. Pike

*Department of Chemistry, The College of William & Mary, P.O. Box 8795, Williamsburg, VA 23187-8795*

|                                                                                              |         |
|----------------------------------------------------------------------------------------------|---------|
| 1. Copies of <sup>1</sup> H and <sup>13</sup> C (APT) NMR Spectra for compounds <b>3a-3o</b> | S2-S31  |
| 2. Table of <sup>19</sup> F NMR resonances with substrates and additives.                    | S32     |
| 3. ORTEP of compound <b>3e</b>                                                               | S33     |
| 3. Tables of crystallographic data for <b>3e</b>                                             | S34-S41 |

rf1-206C;pure; DHP butyl vinyl side chain and styrene oxide; CDCl3;07/01/2010  
Automation directory:  
Pulse Sequence: s2pu1

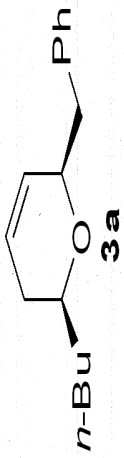

<sup>1</sup>H NMR

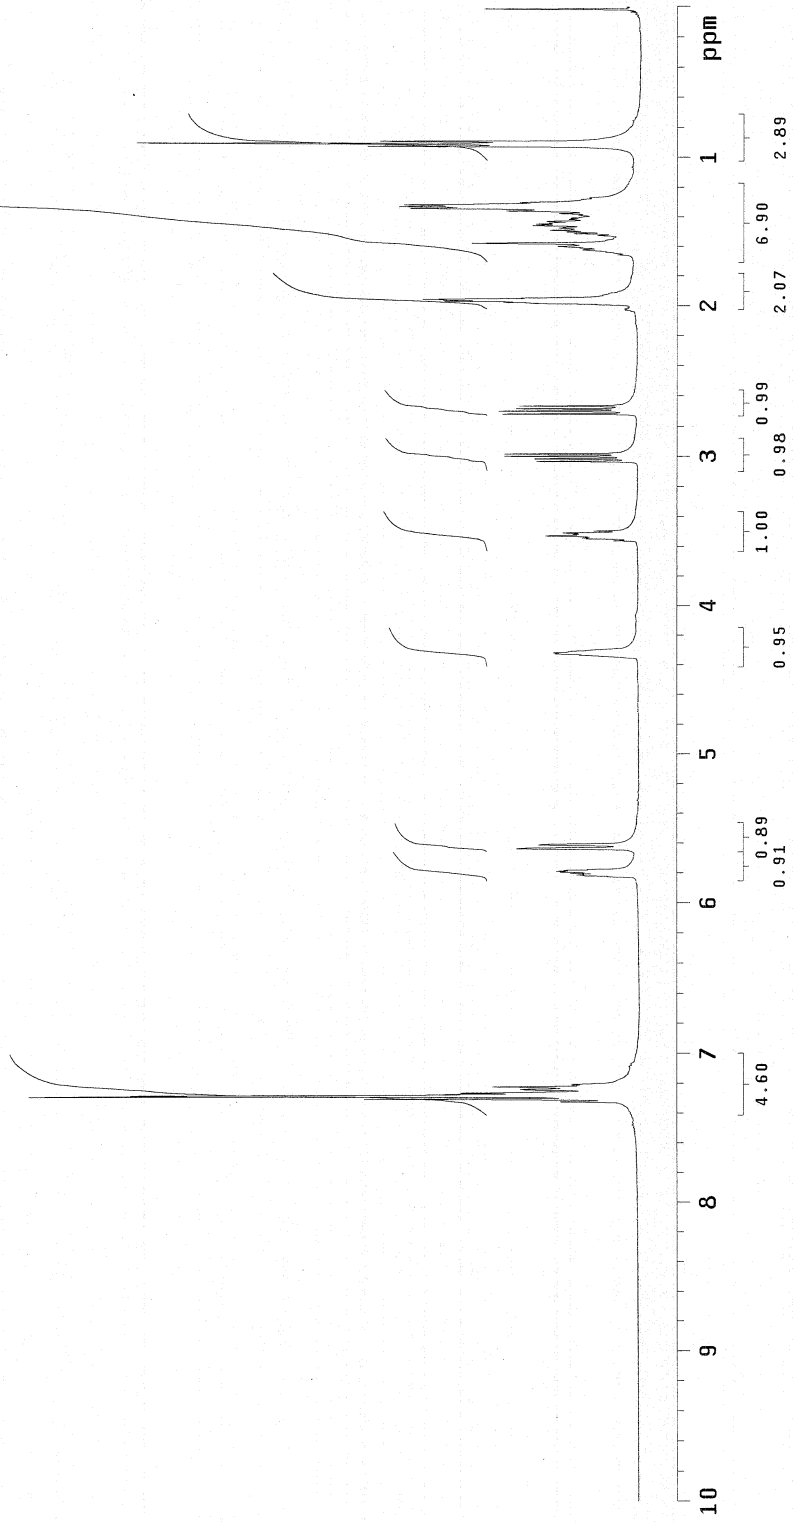

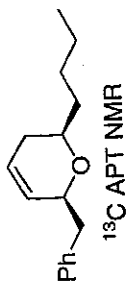

Compound 3a

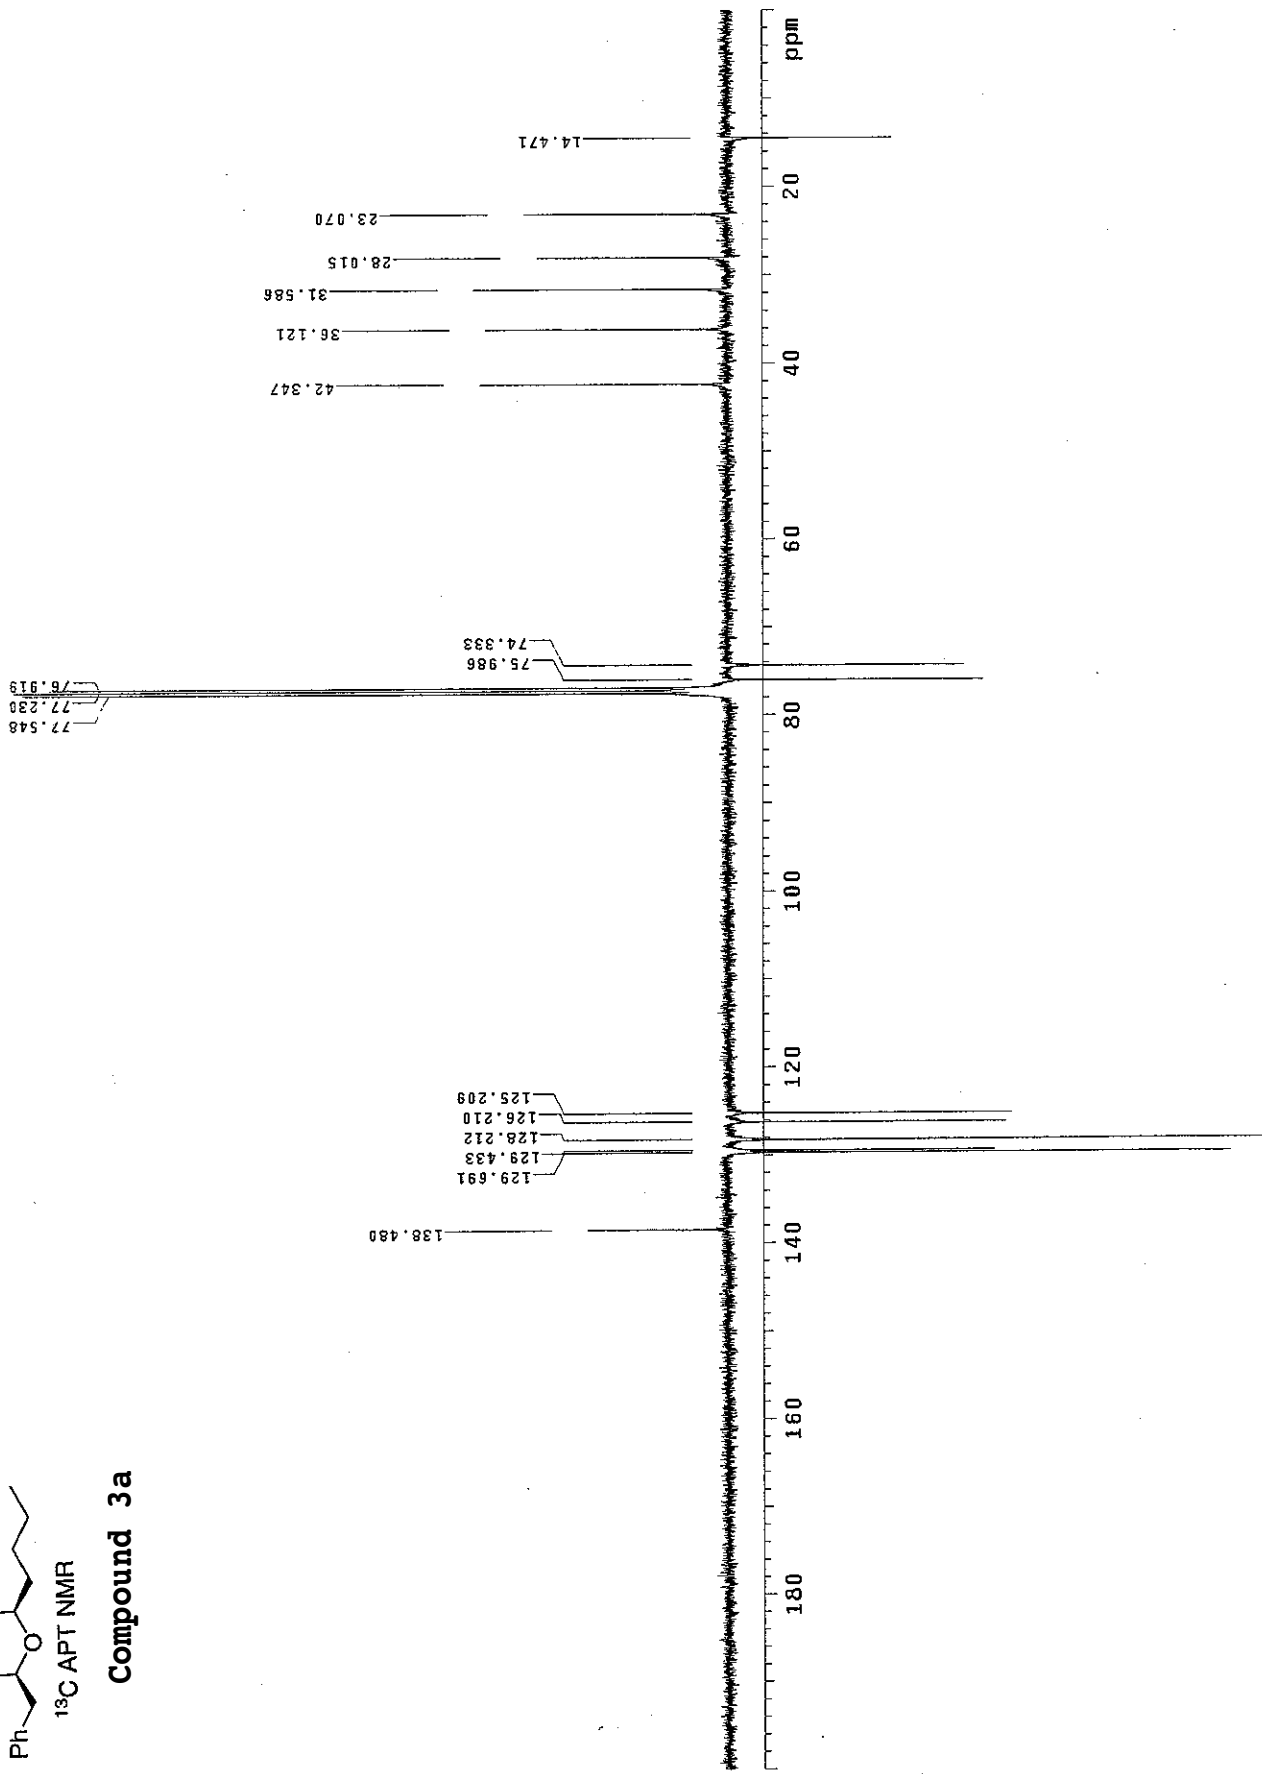

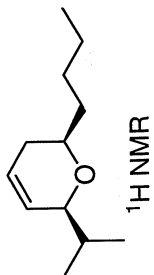

<sup>1</sup>H NMR for compound **3b**

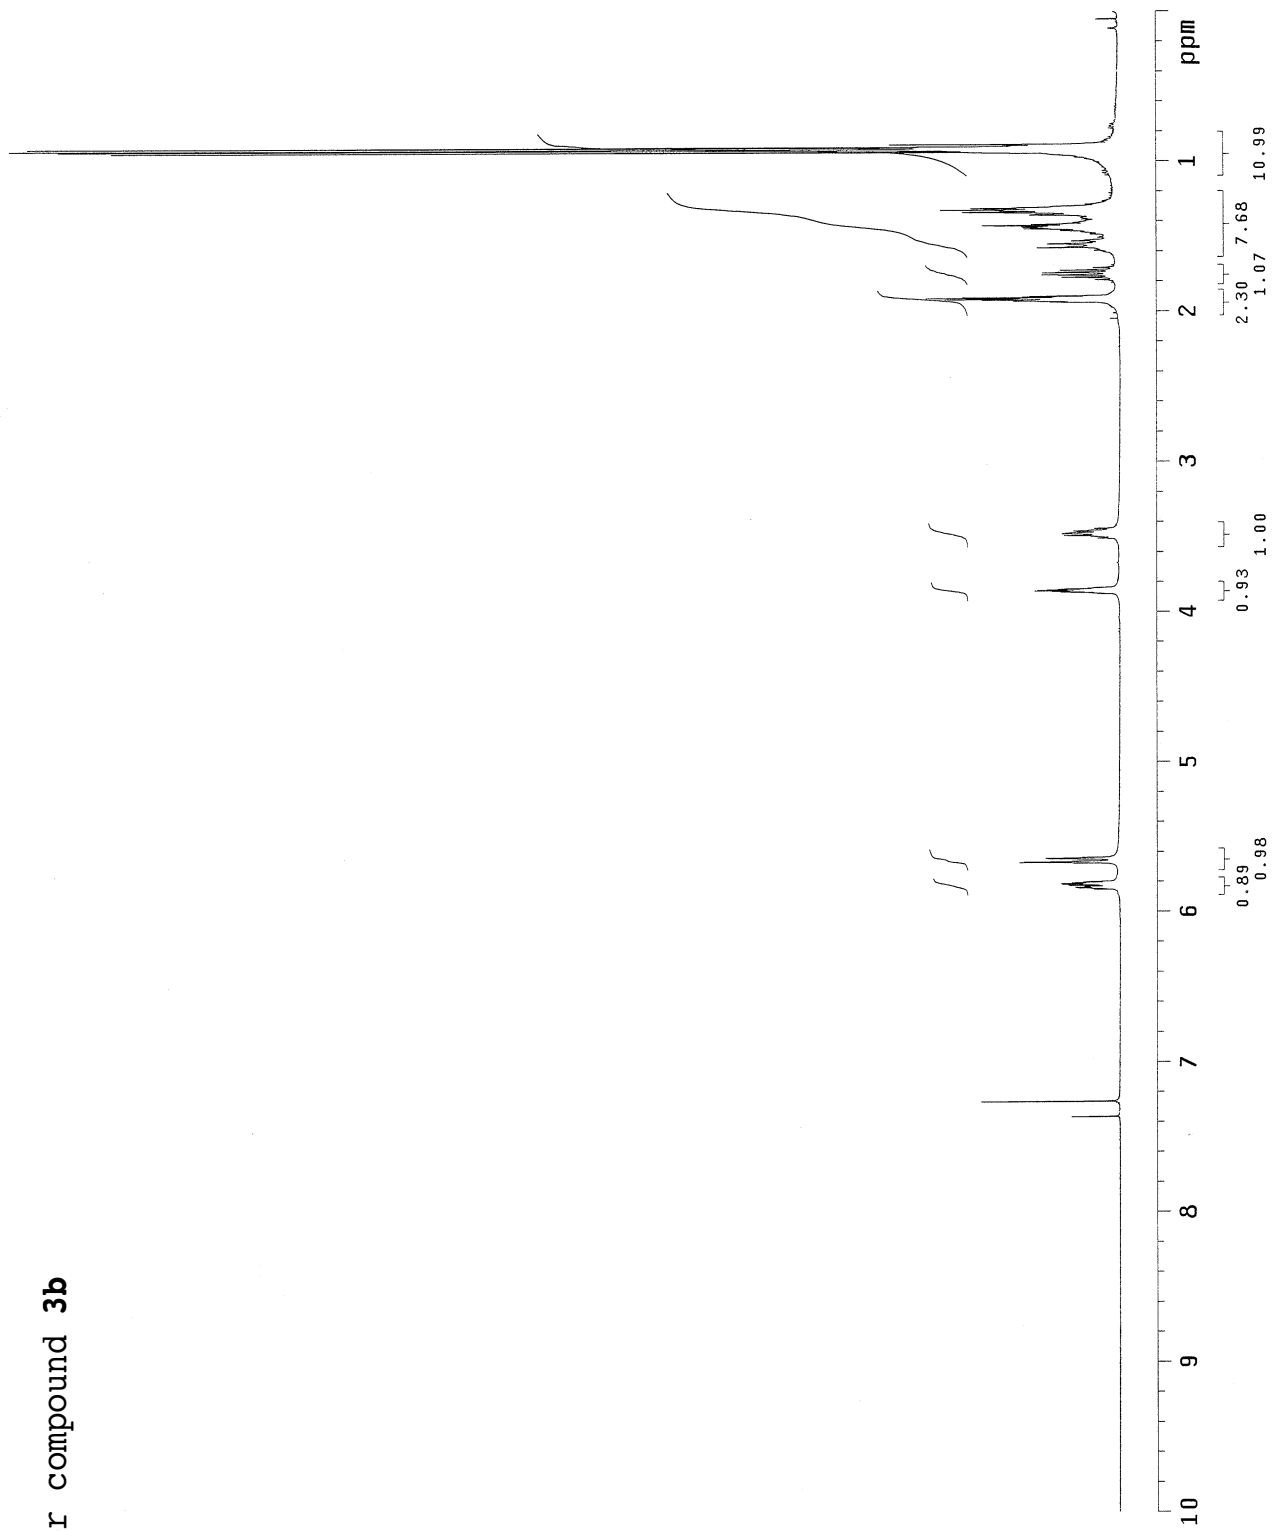

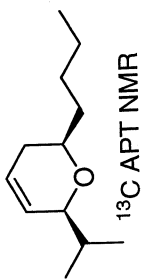

**Compound 3b**

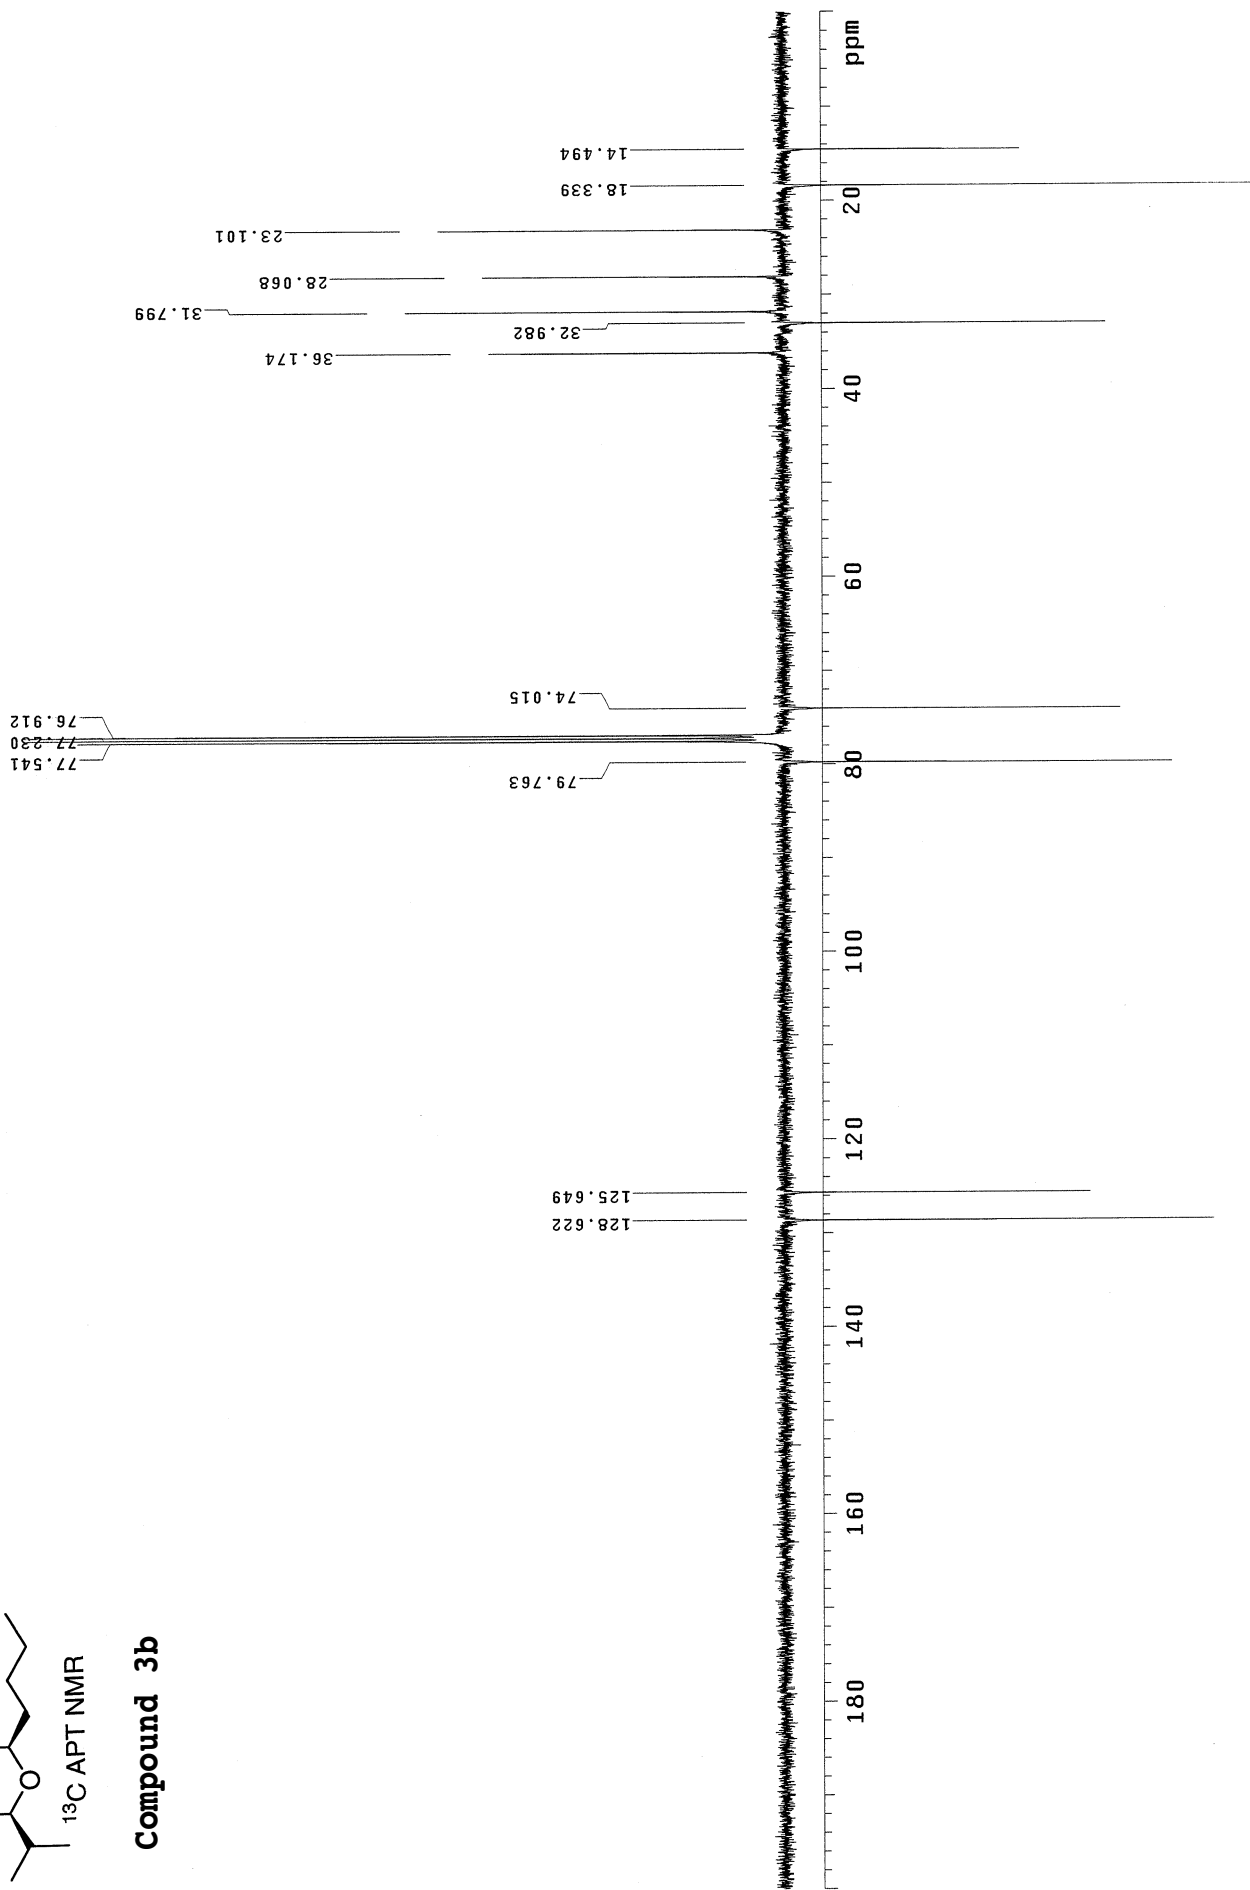

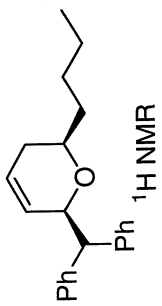

Compound **3c**

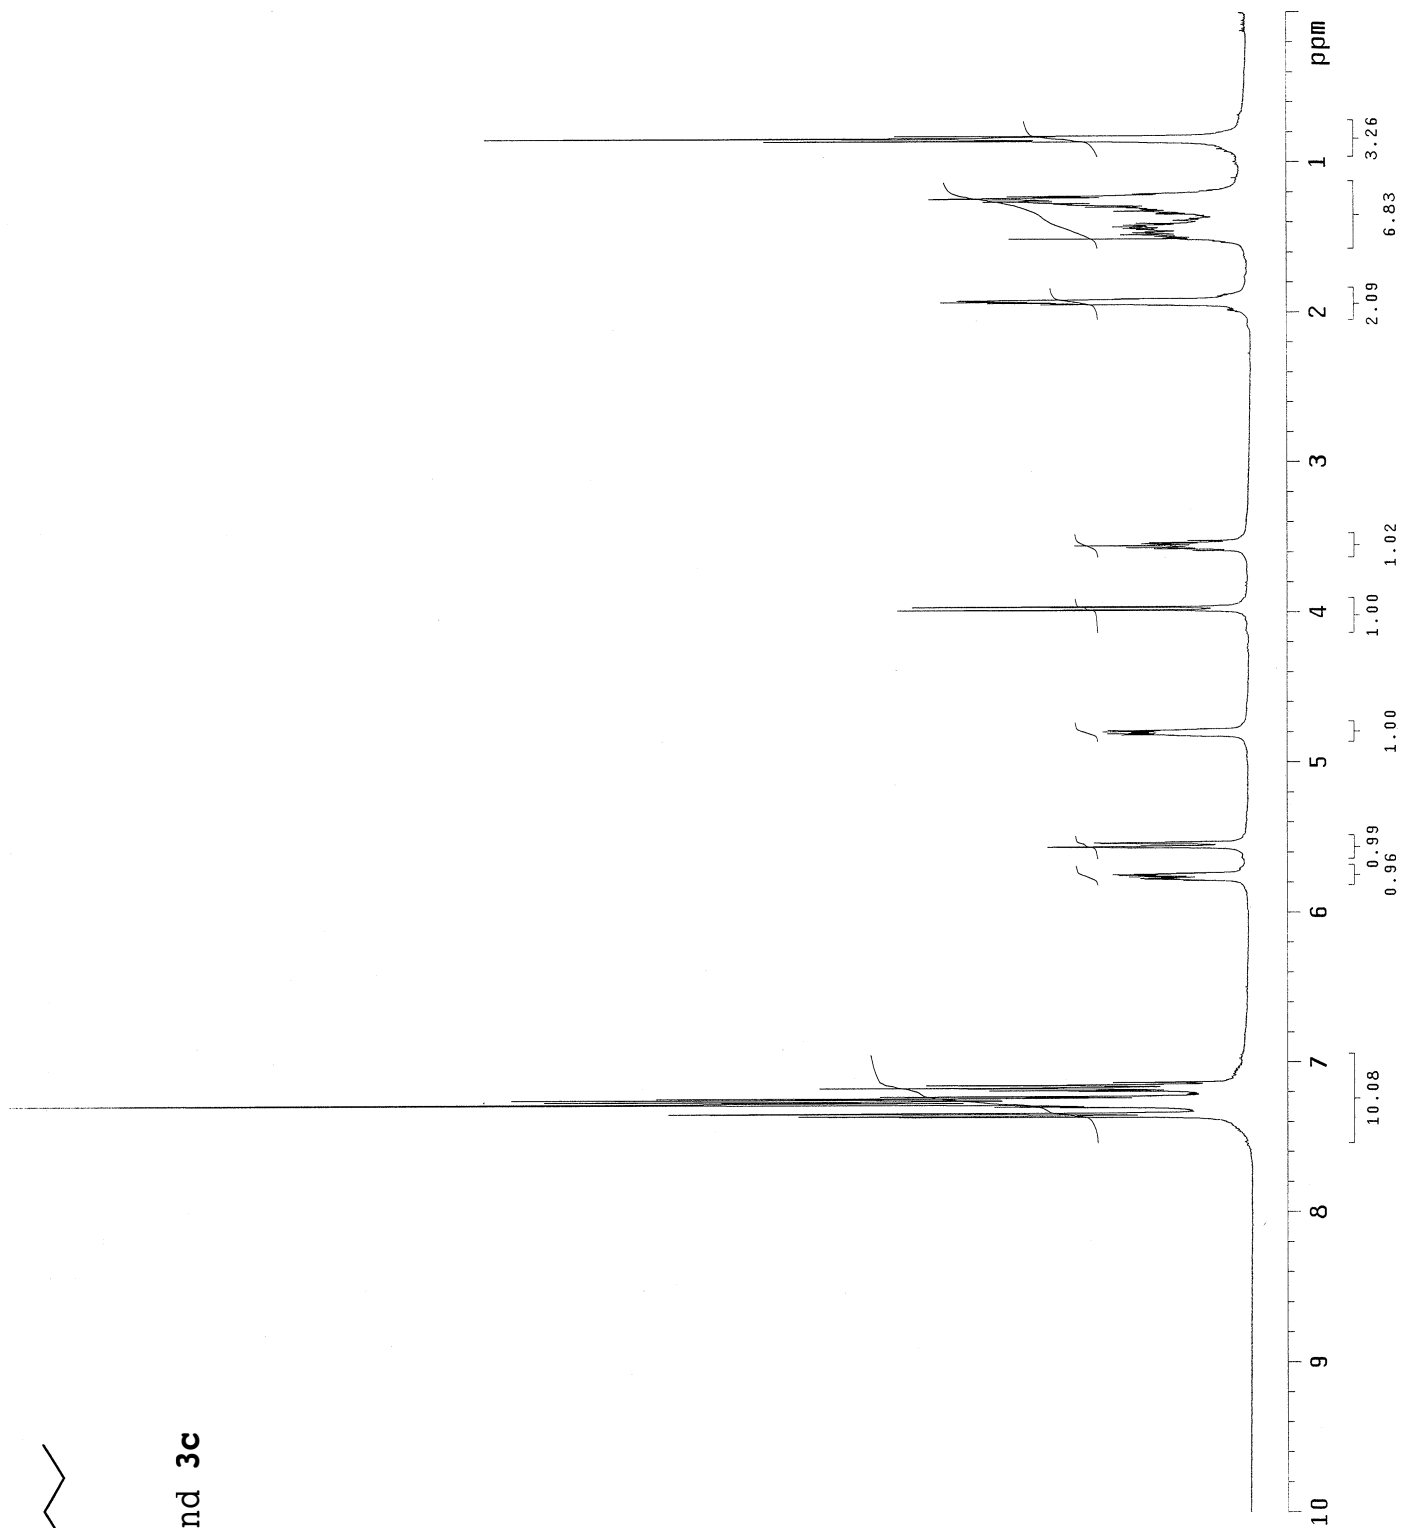

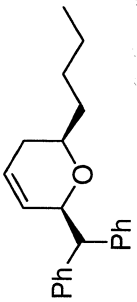

<sup>13</sup>C APT NMR

compound **3c**

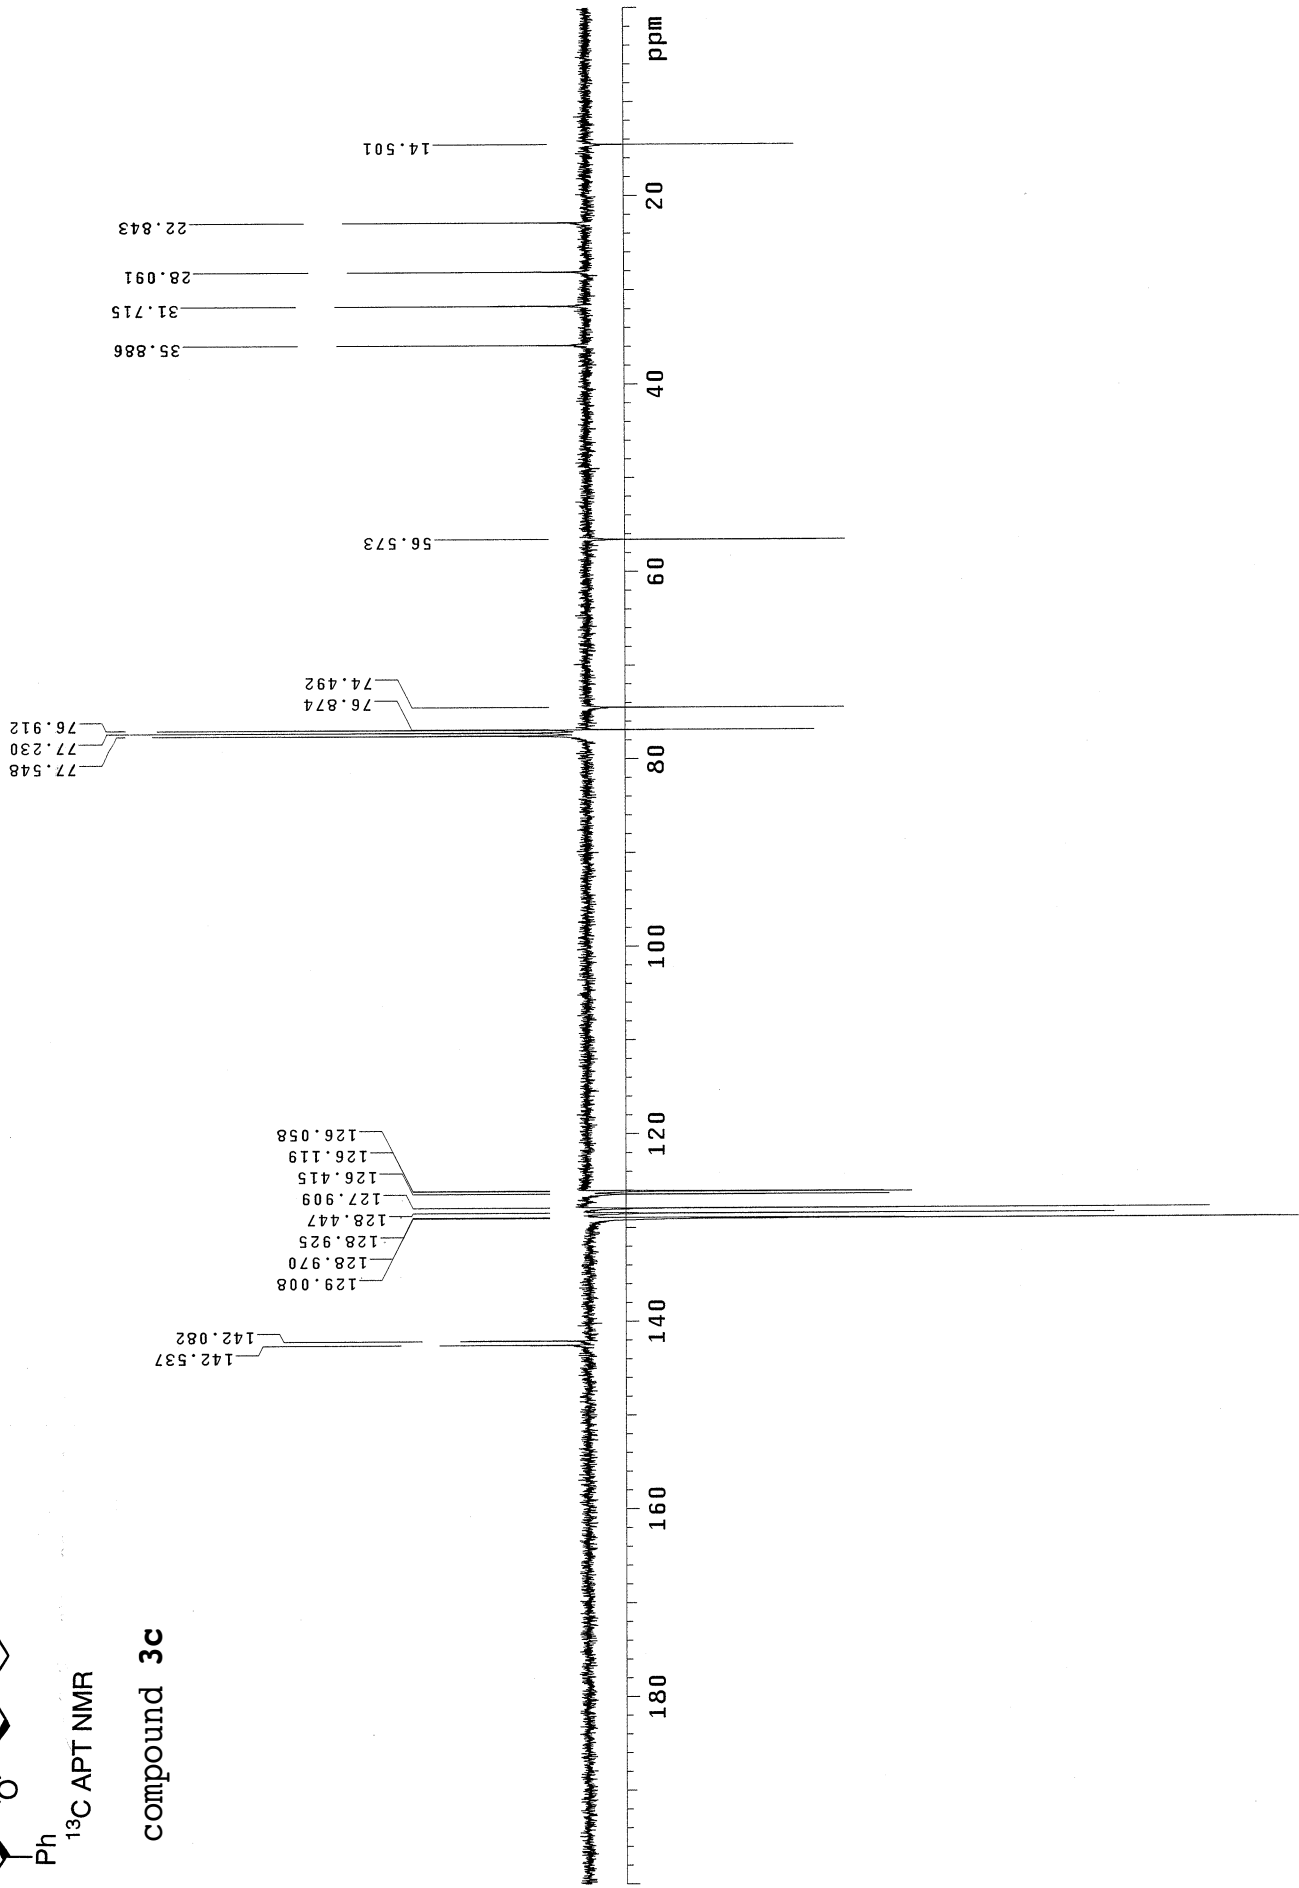

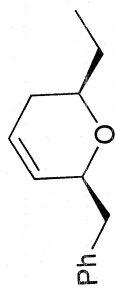

<sup>1</sup>H NMR

Compound **3d**

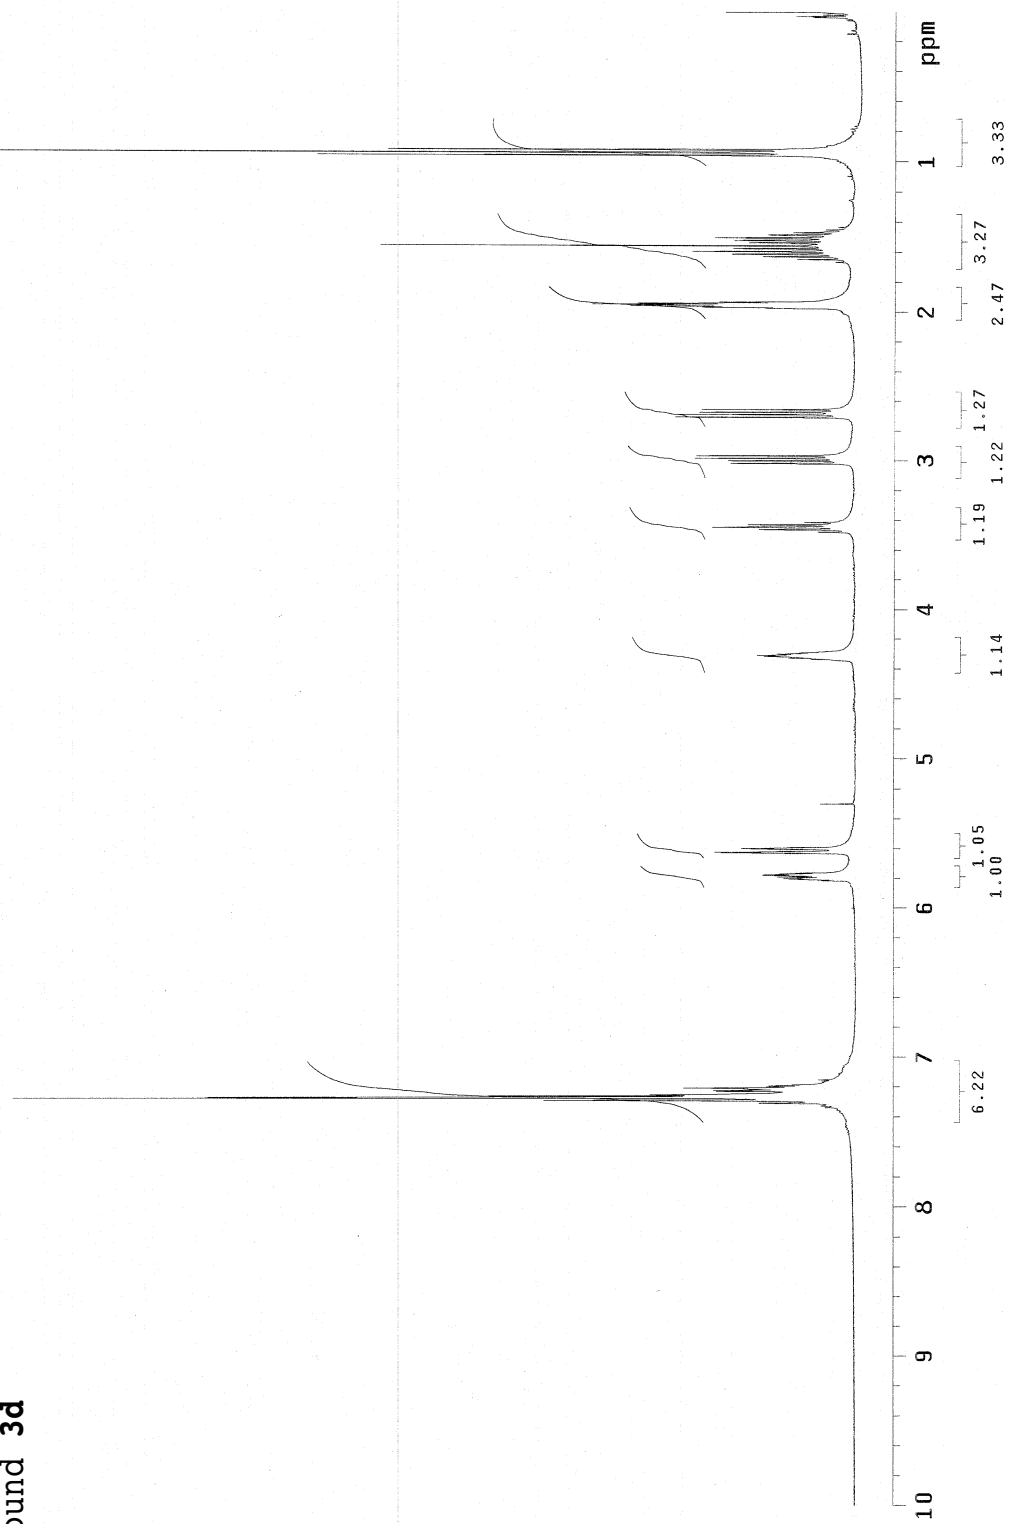



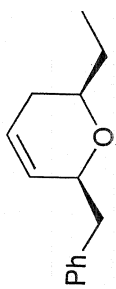

<sup>13</sup>C APT NMR

Compound **3d**

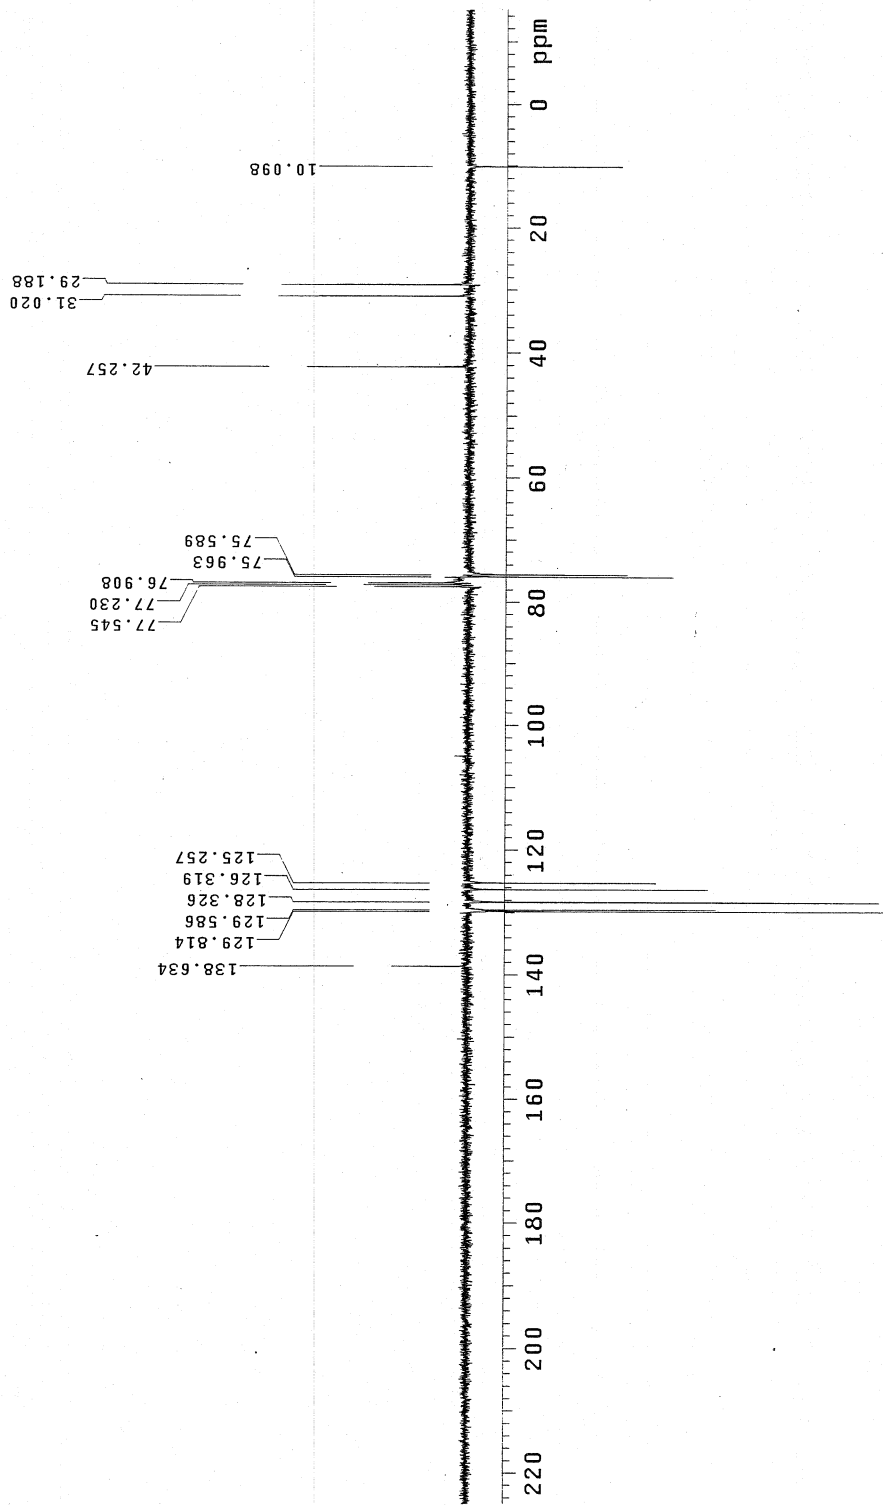

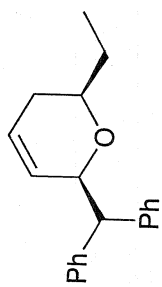

<sup>1</sup>H NMR

compound 3e

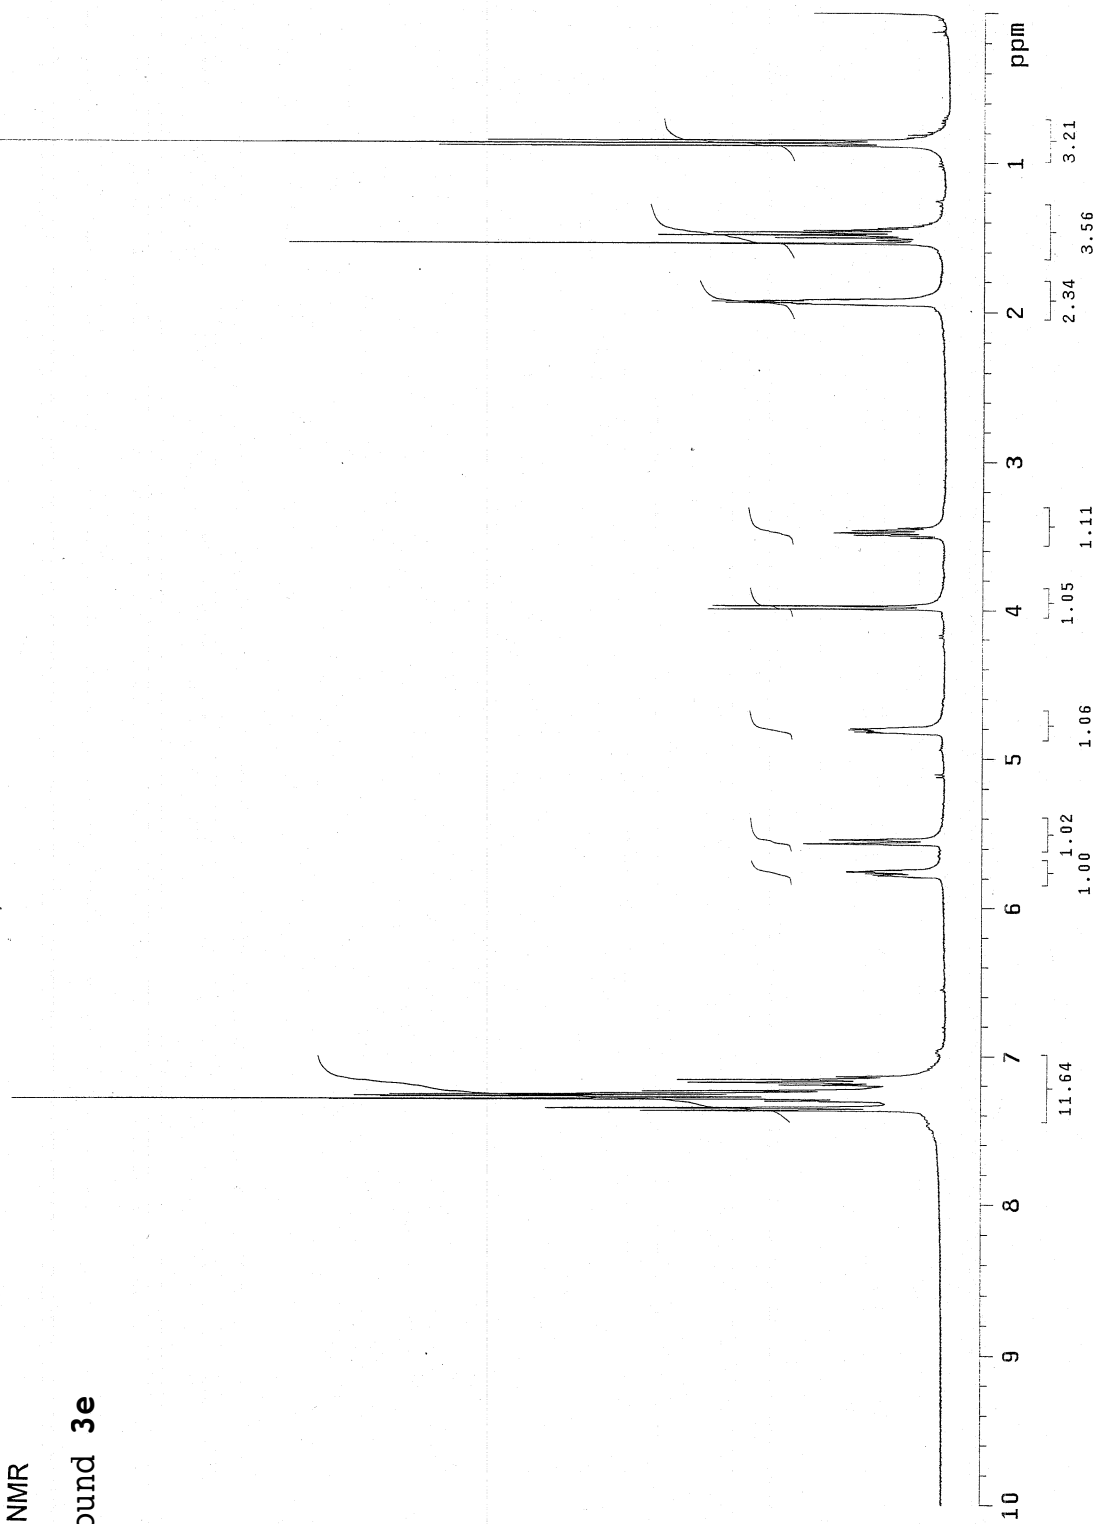

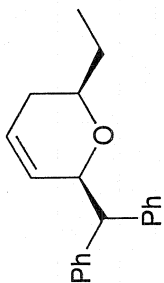

<sup>13</sup>C APT NMR

Compound **3e**

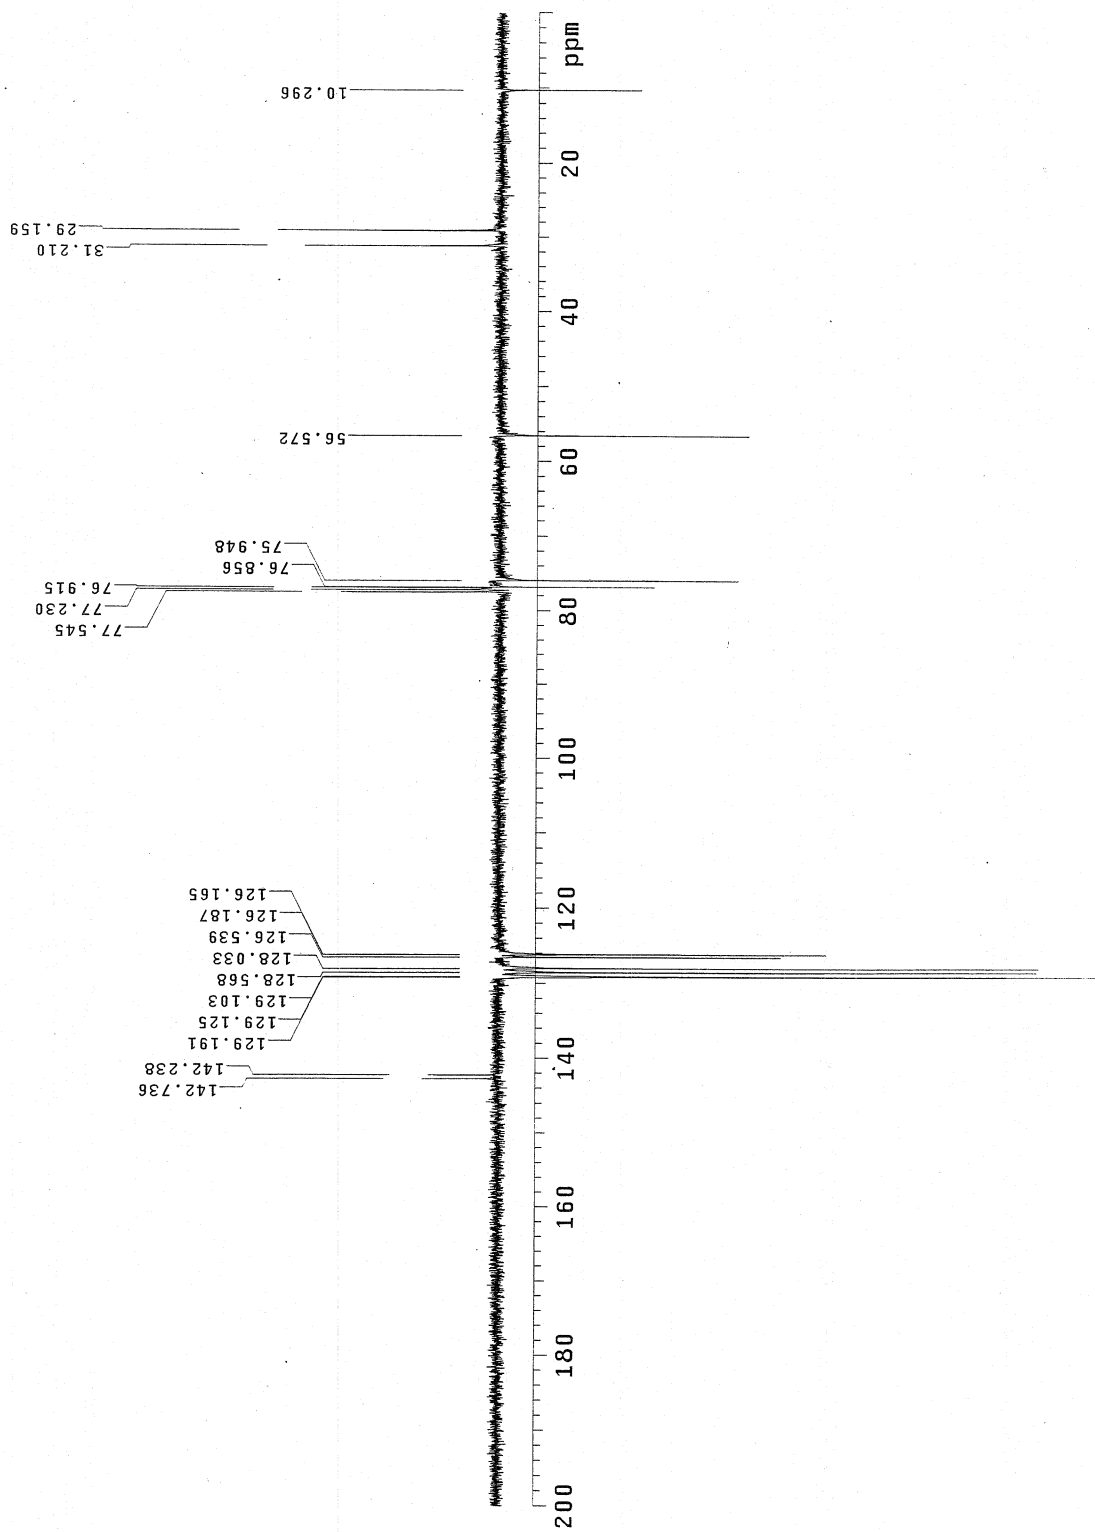

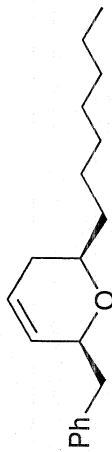

<sup>1</sup>H NMR

Compound **3f**

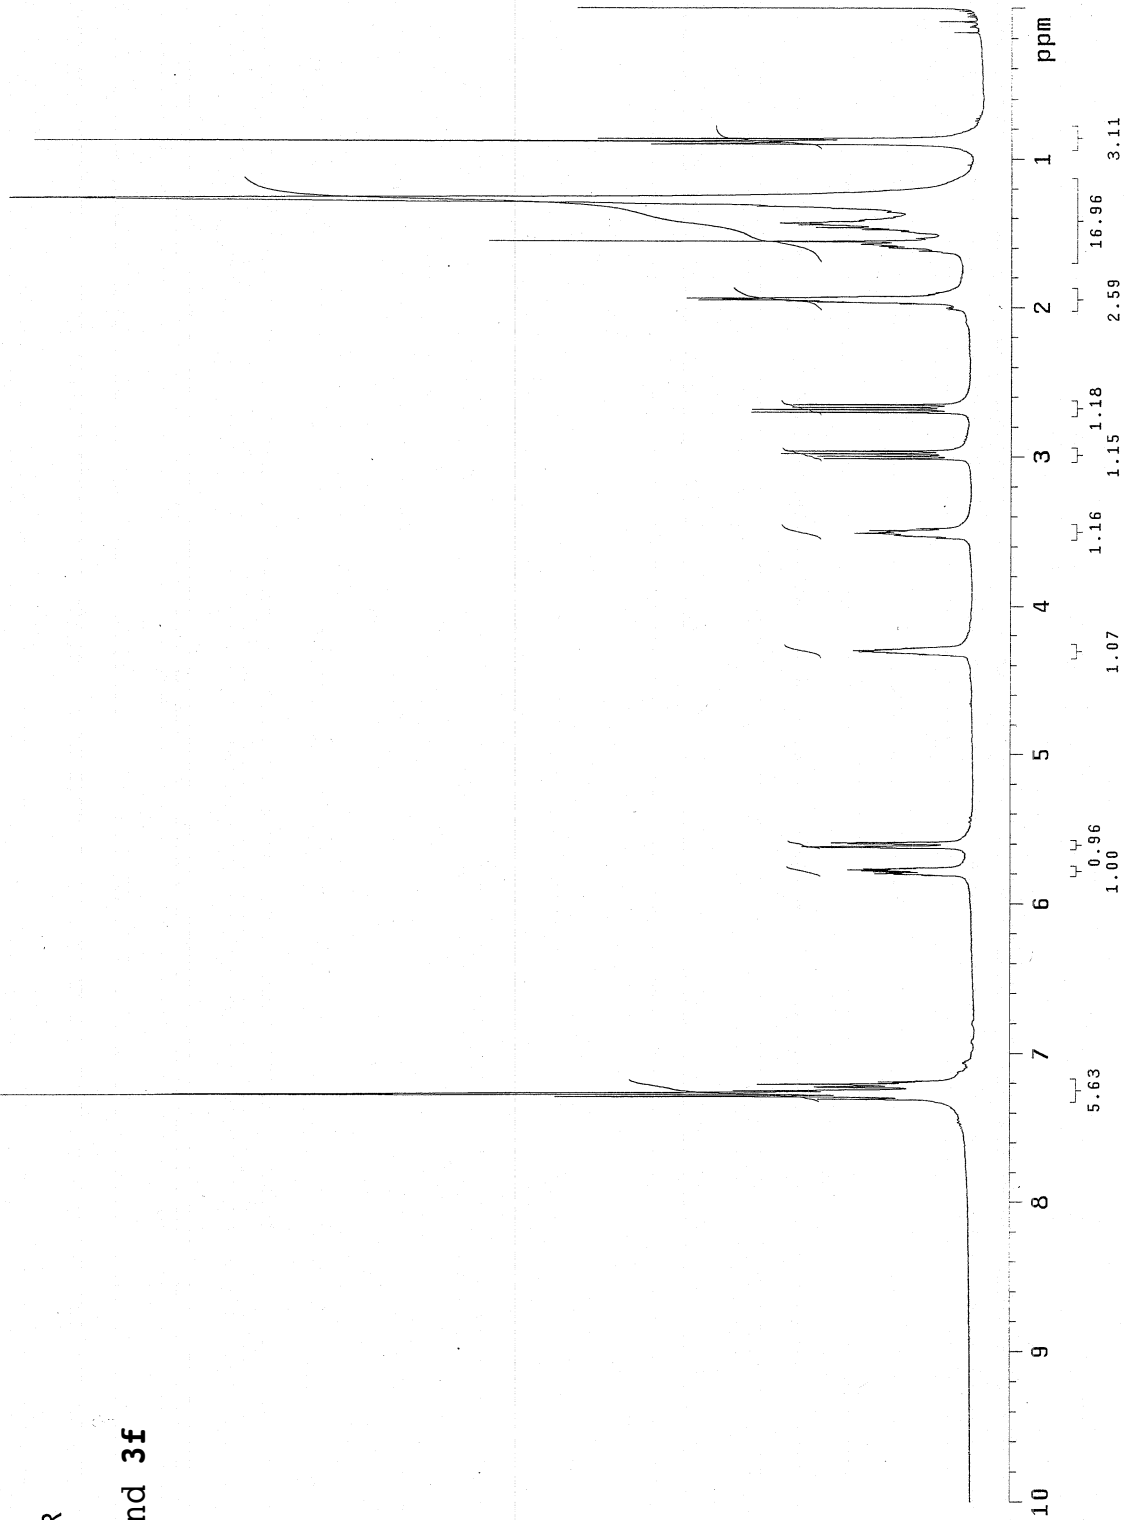

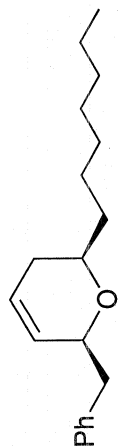

<sup>13</sup>C APT NMR

Compound **3f**

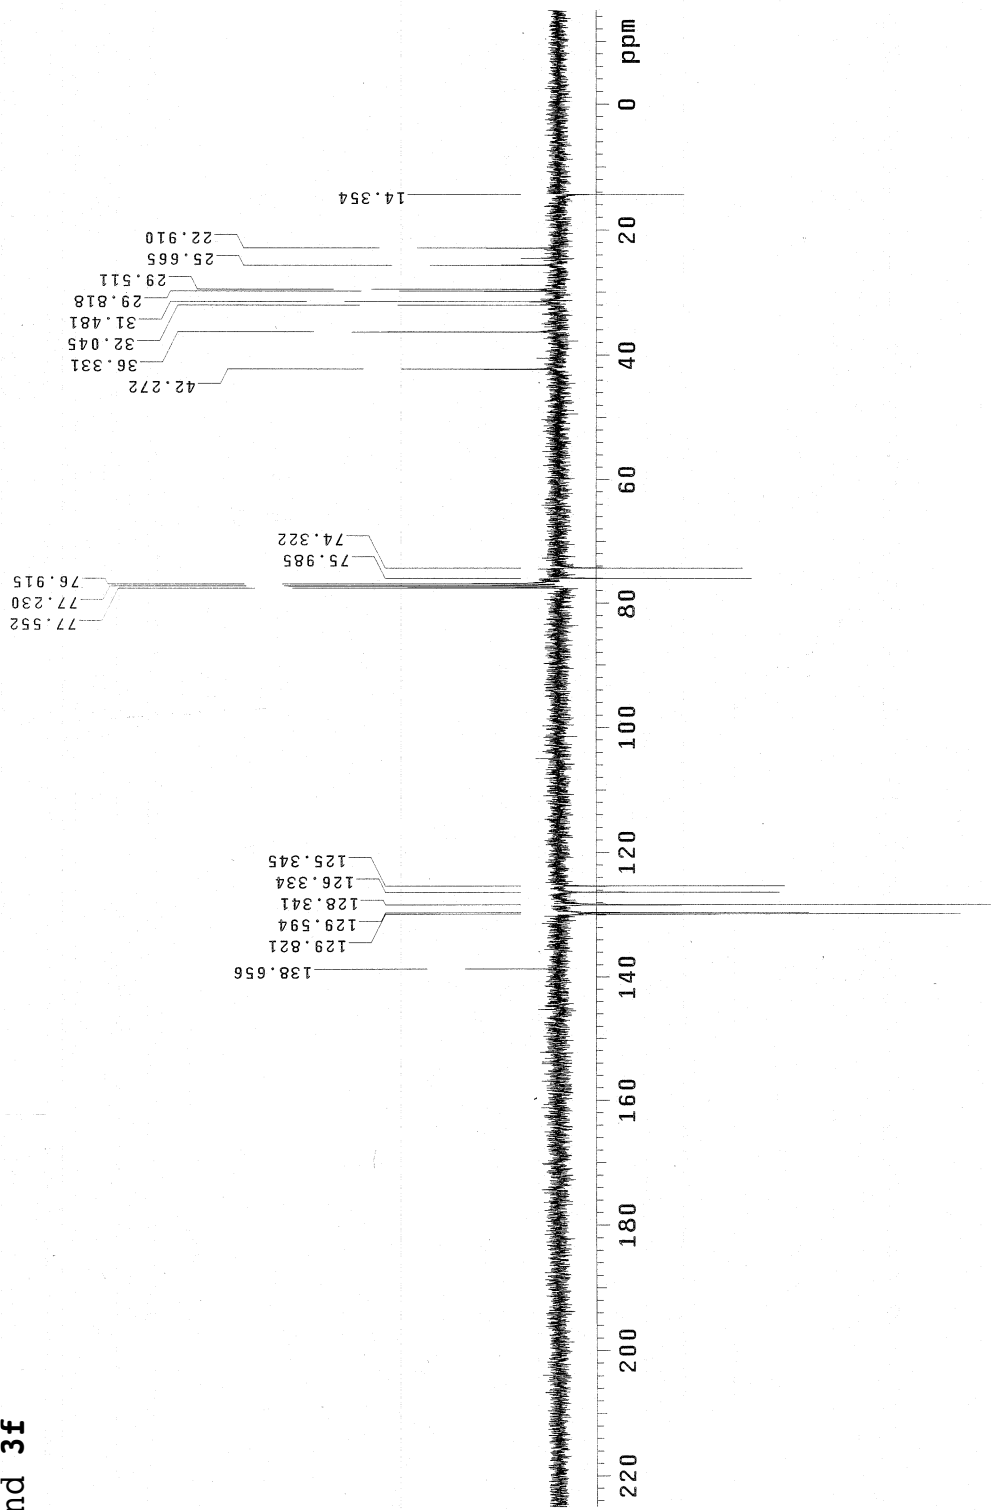

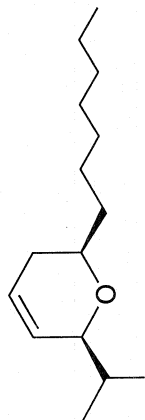

<sup>1</sup>H NMR

Compound **3g**

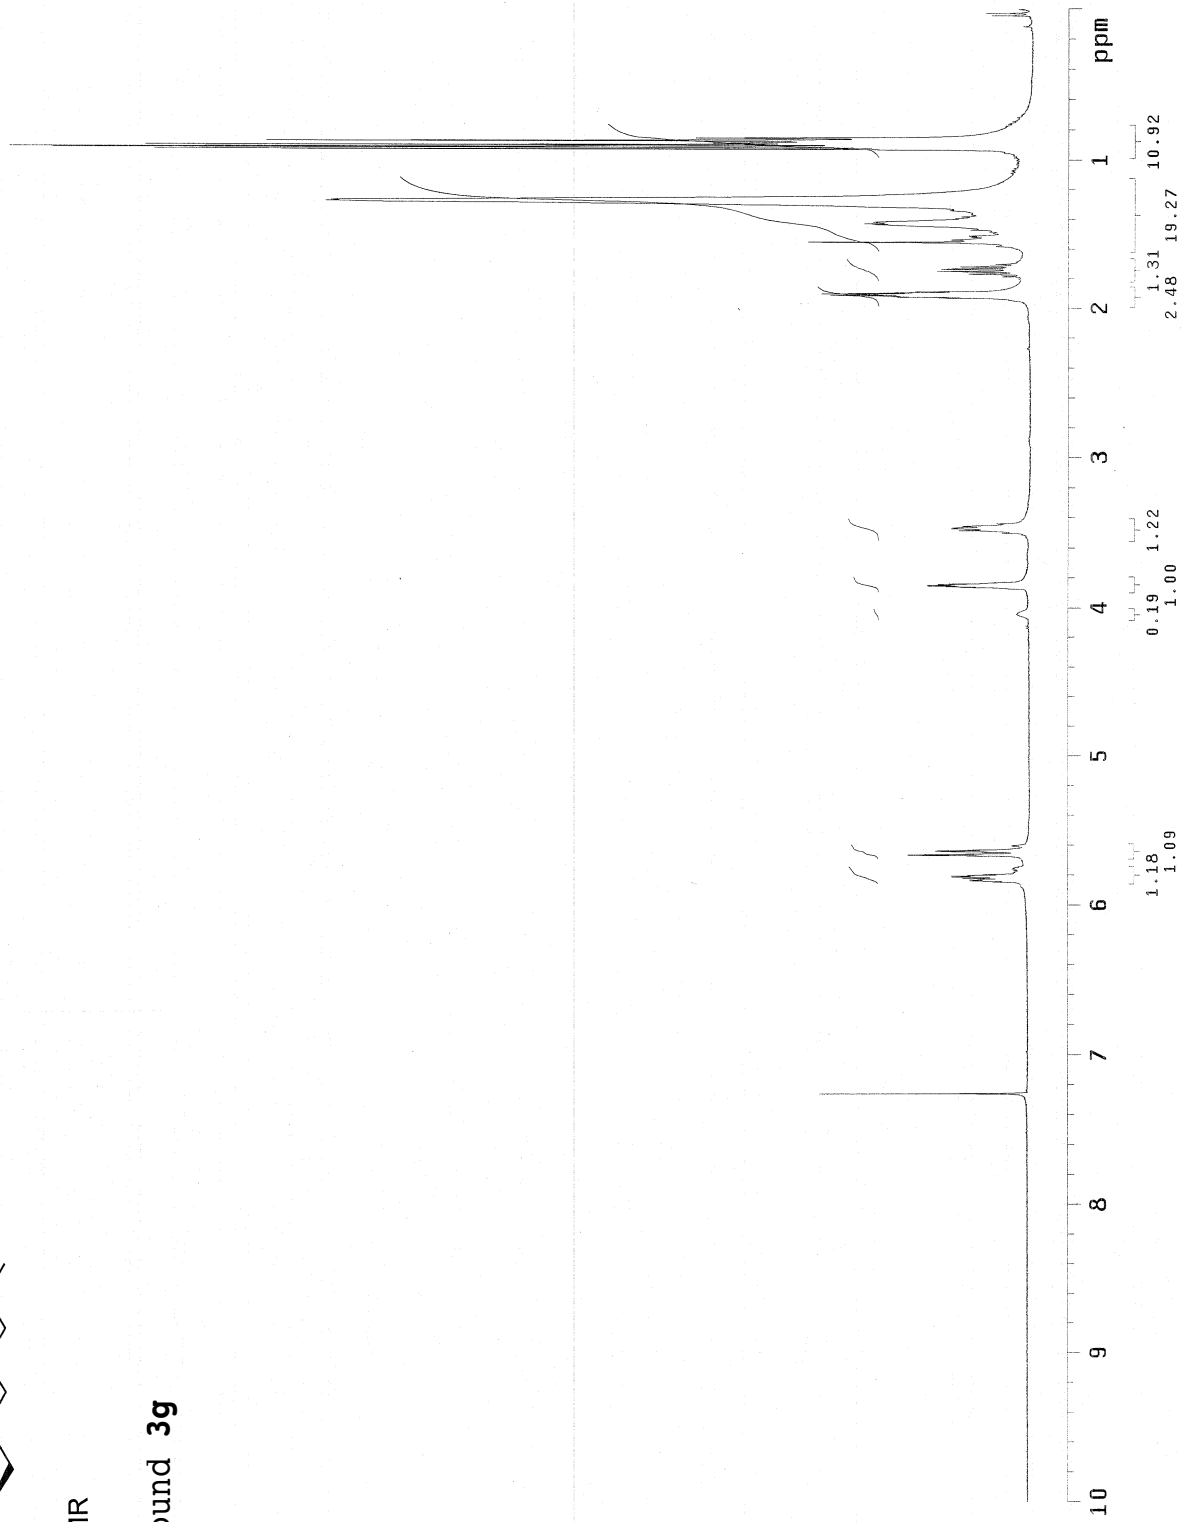

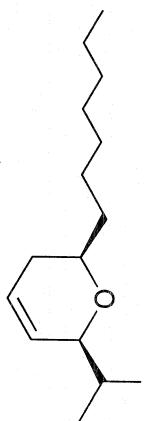

<sup>13</sup>C APT NMR

Compound **3g**

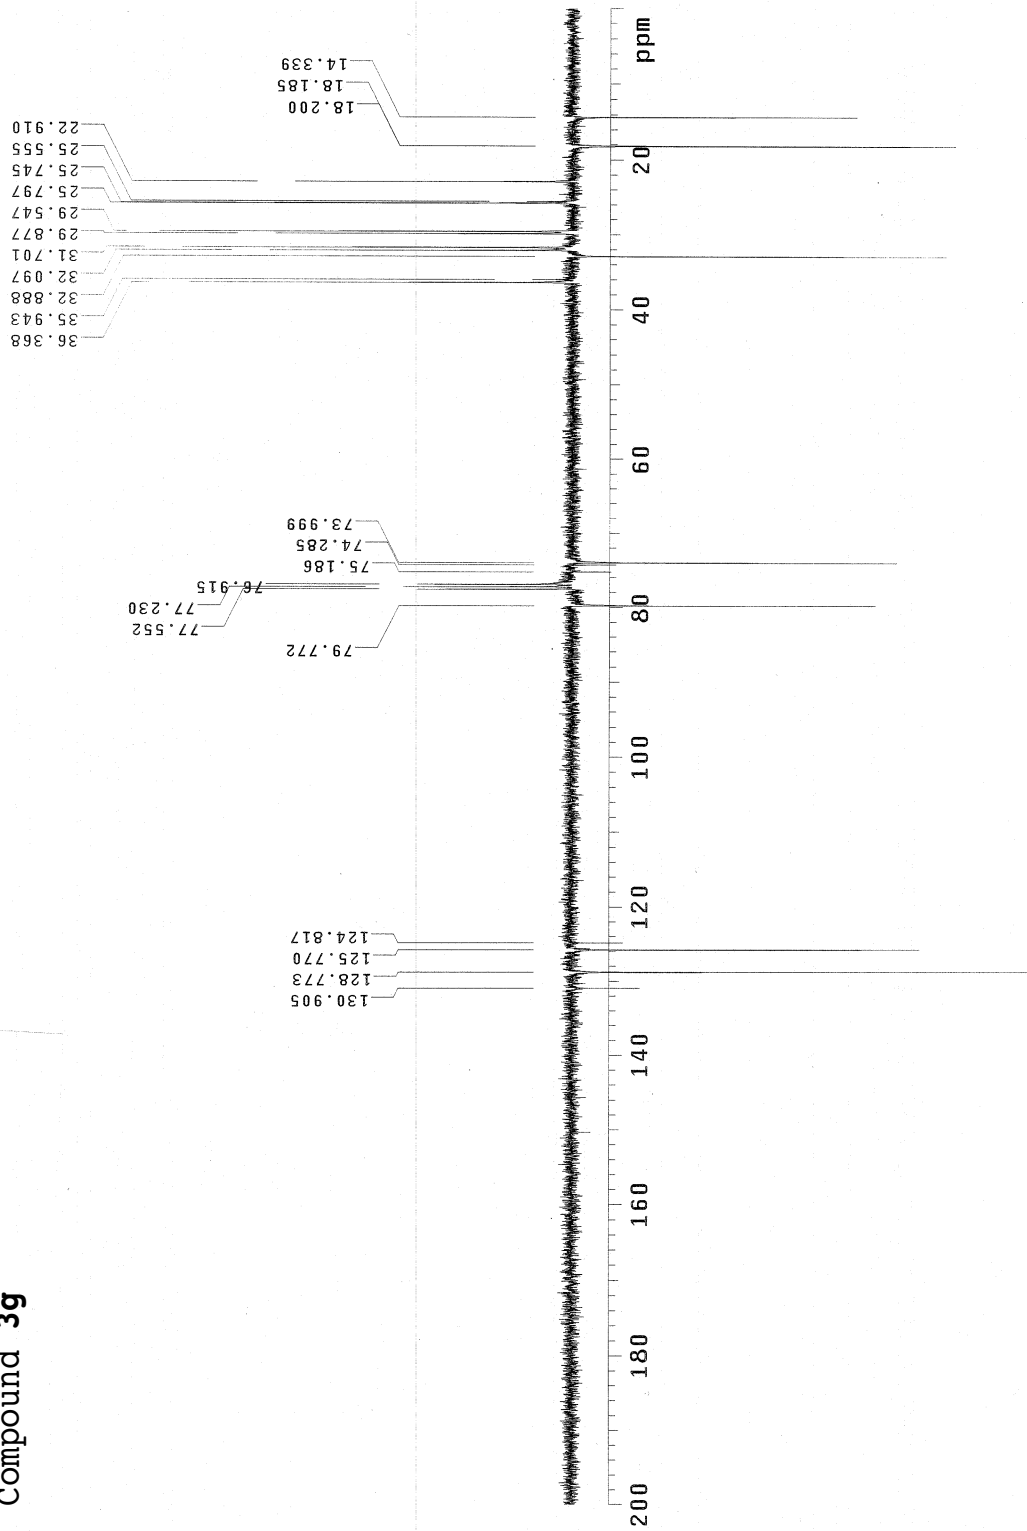

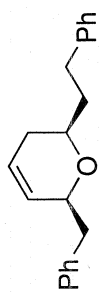

<sup>1</sup>H NMR

Compound **3h**

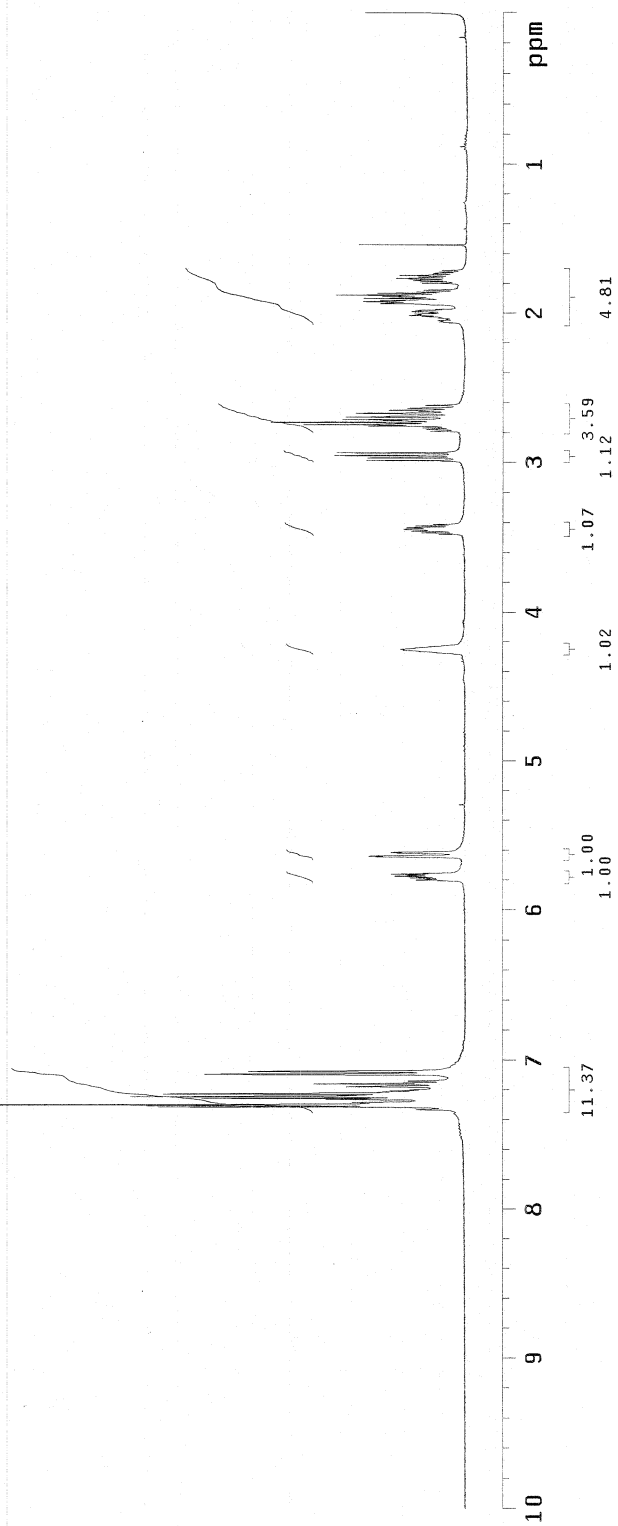



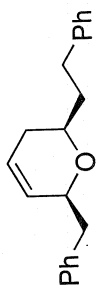

<sup>13</sup>C APT NMR

Compound **3h**

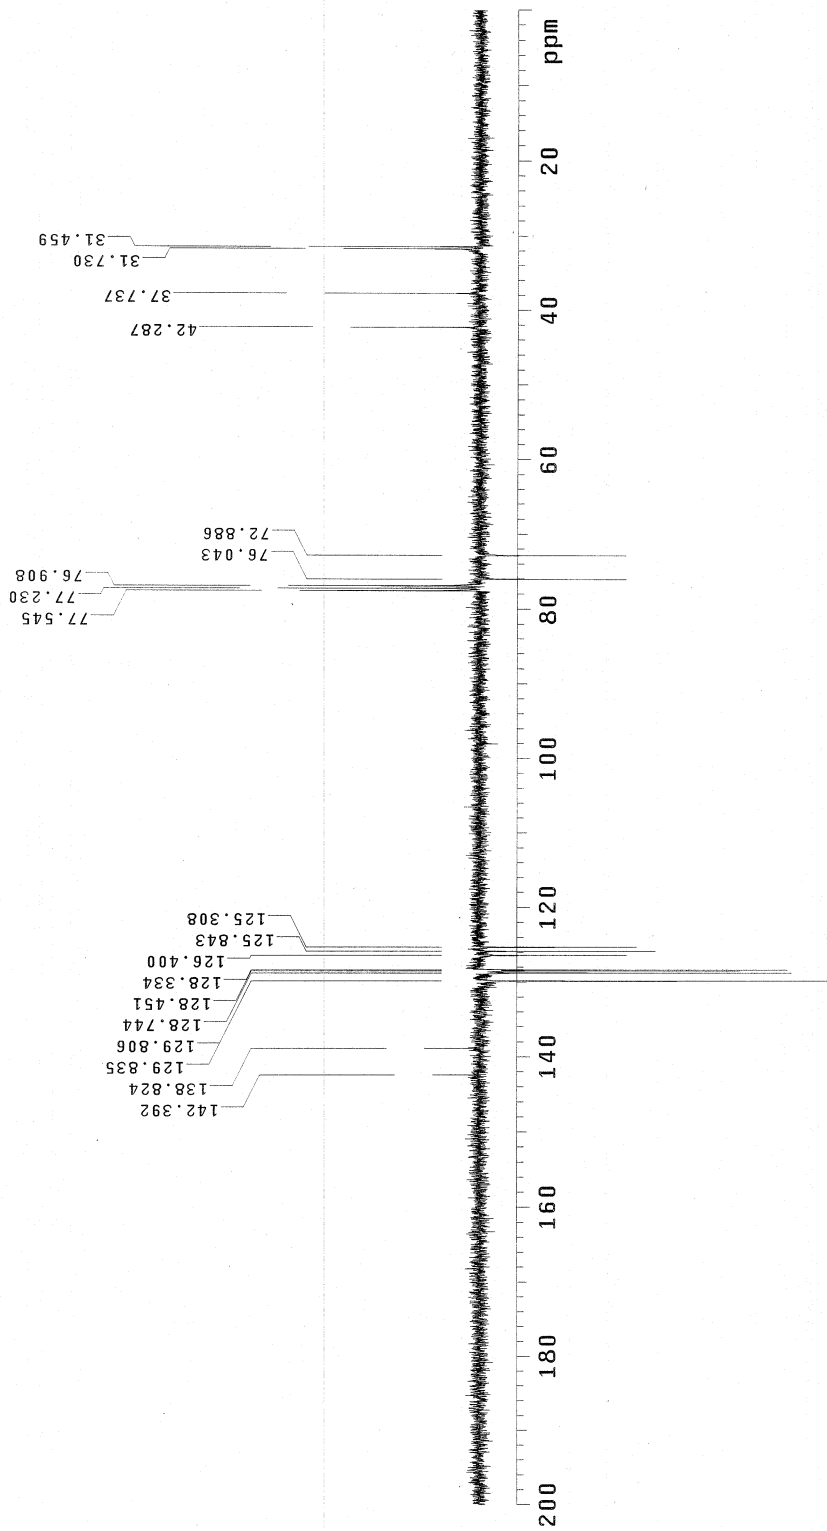

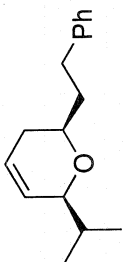

<sup>1</sup>H NMR

Compound **3i**

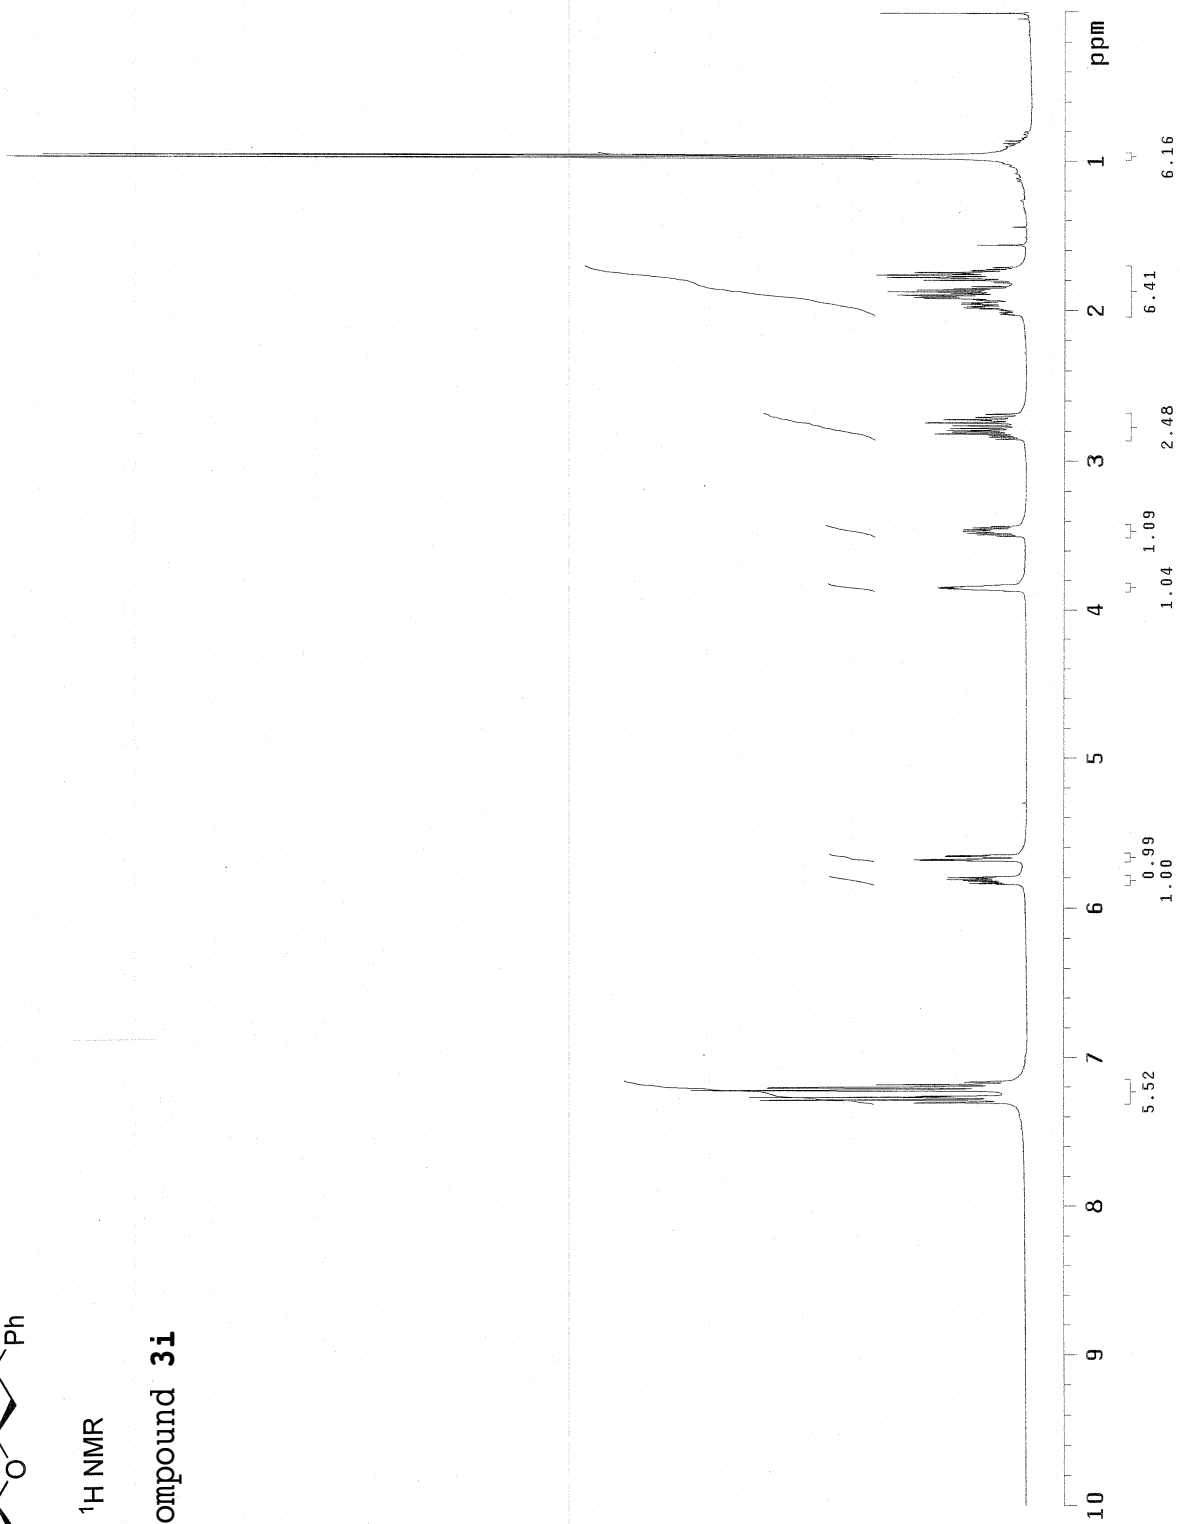

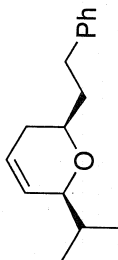

<sup>13</sup>C APT NMR

Compound **3i**

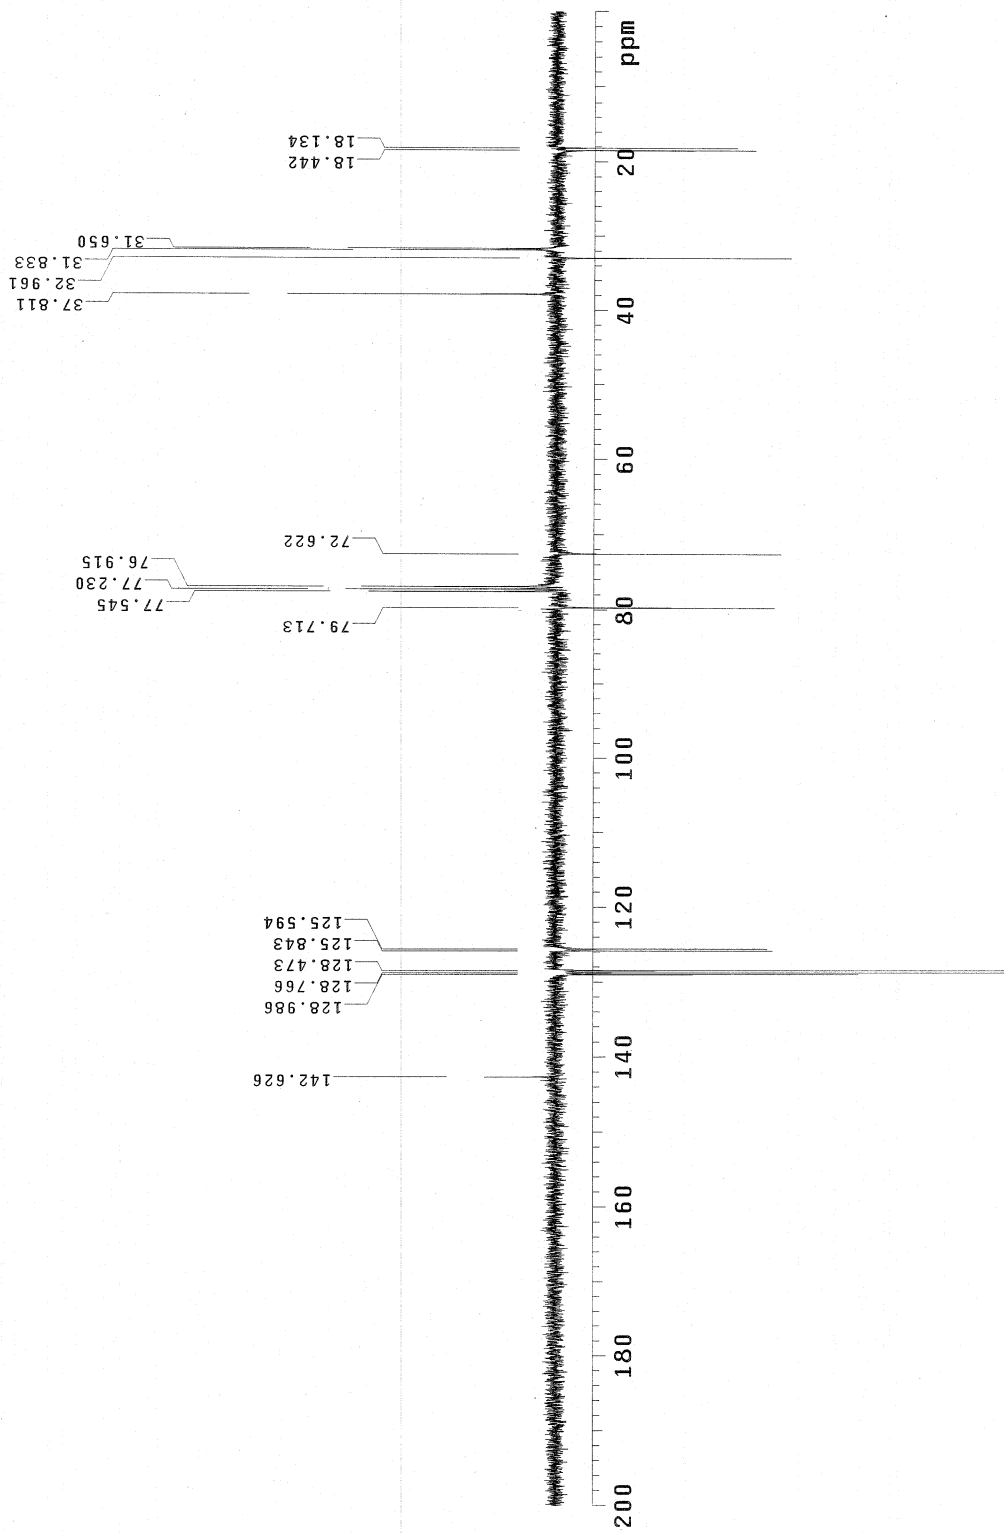

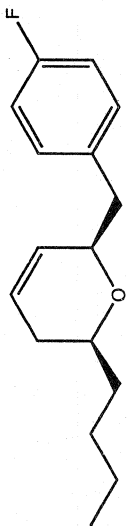

<sup>1</sup>H NMR

Compound 3j

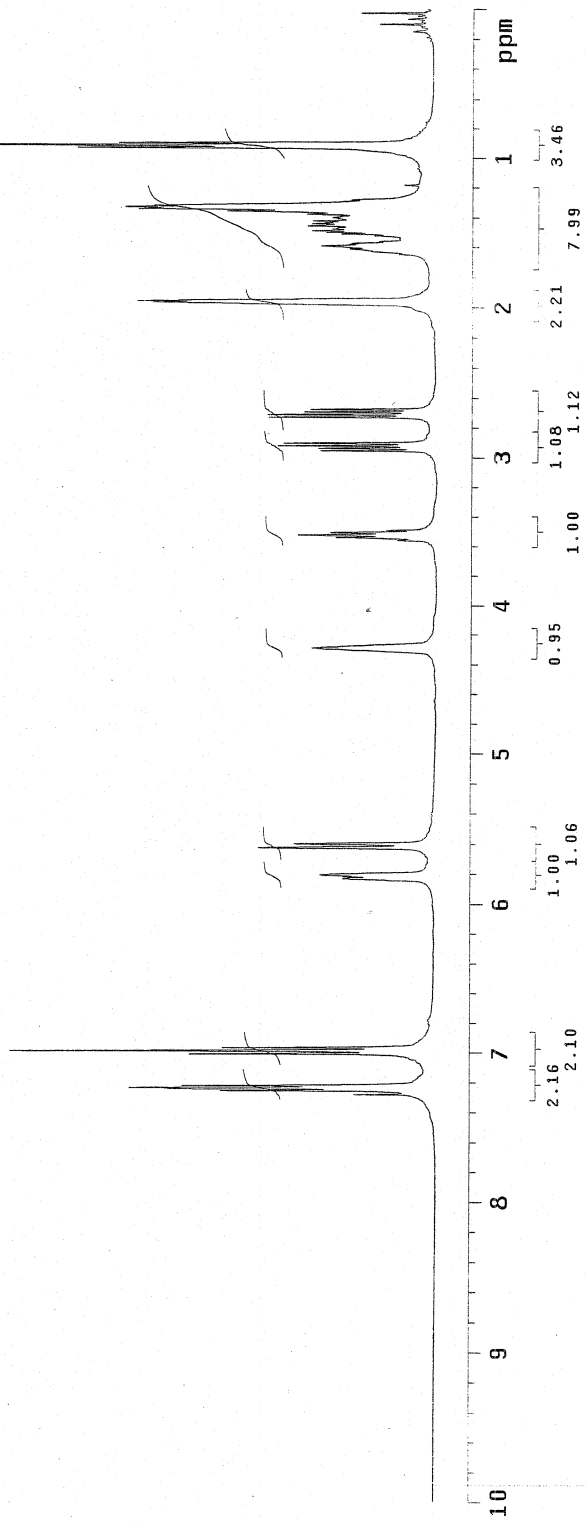

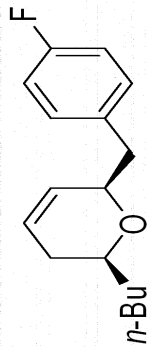

13C APT NMR

Compound 3j

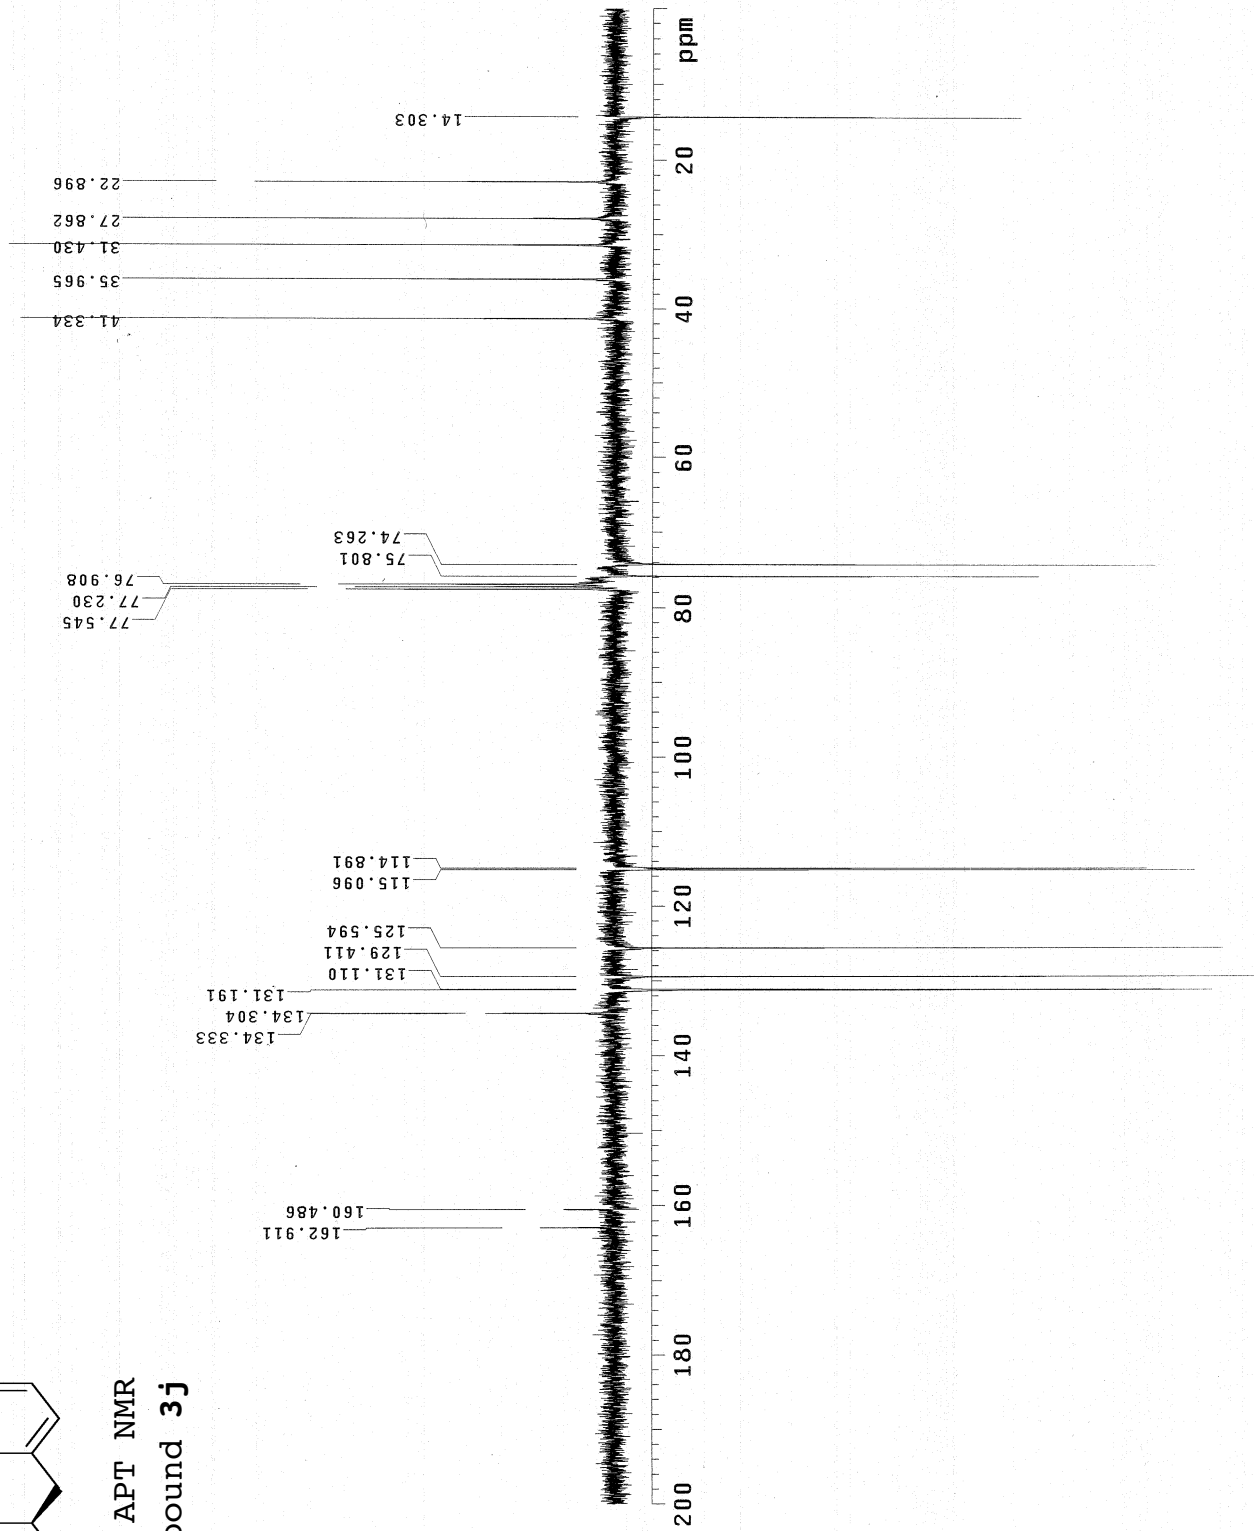

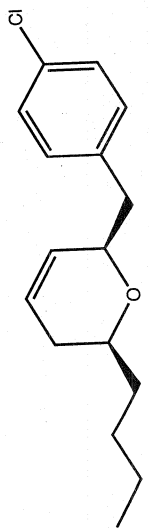

<sup>1</sup>H NMR

Compound **3k**

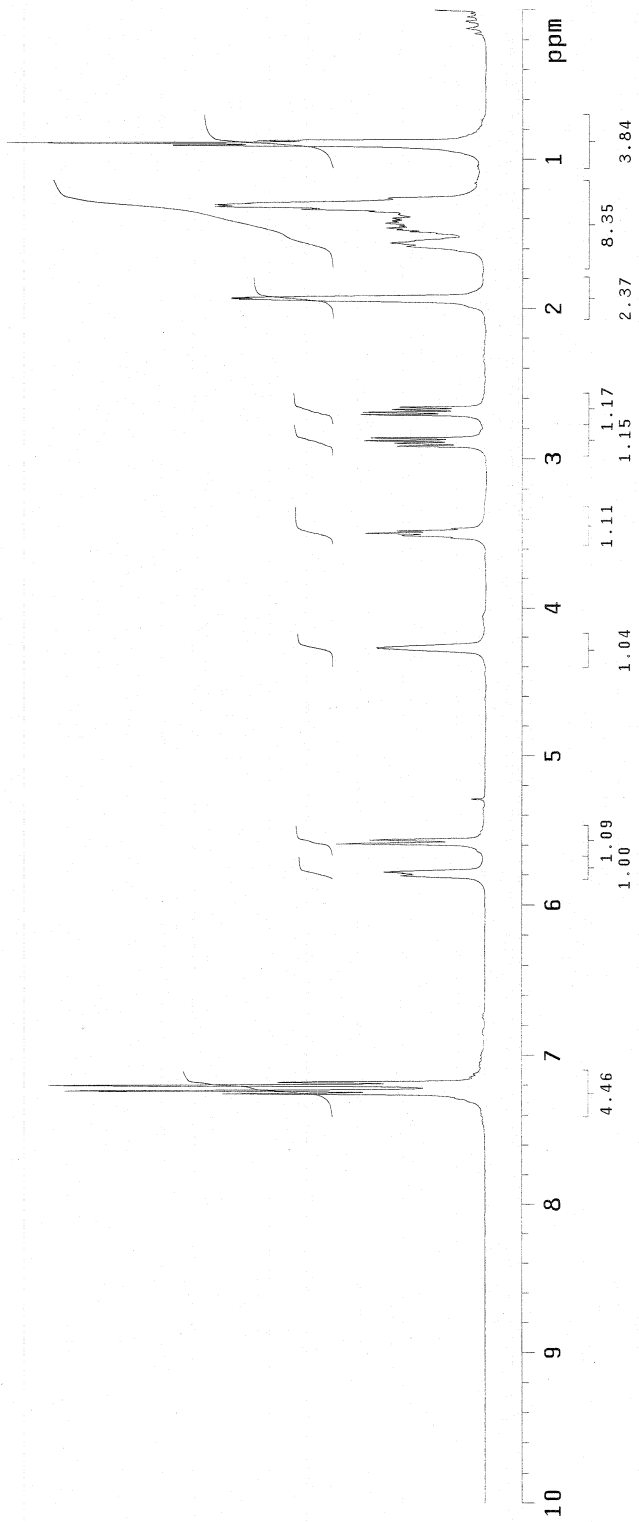

Automation directory:

Pulse Sequence: APT

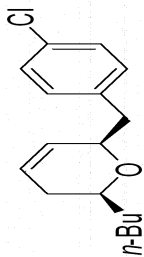

**<sup>13</sup>C APT NMR**

**Compound 3k**

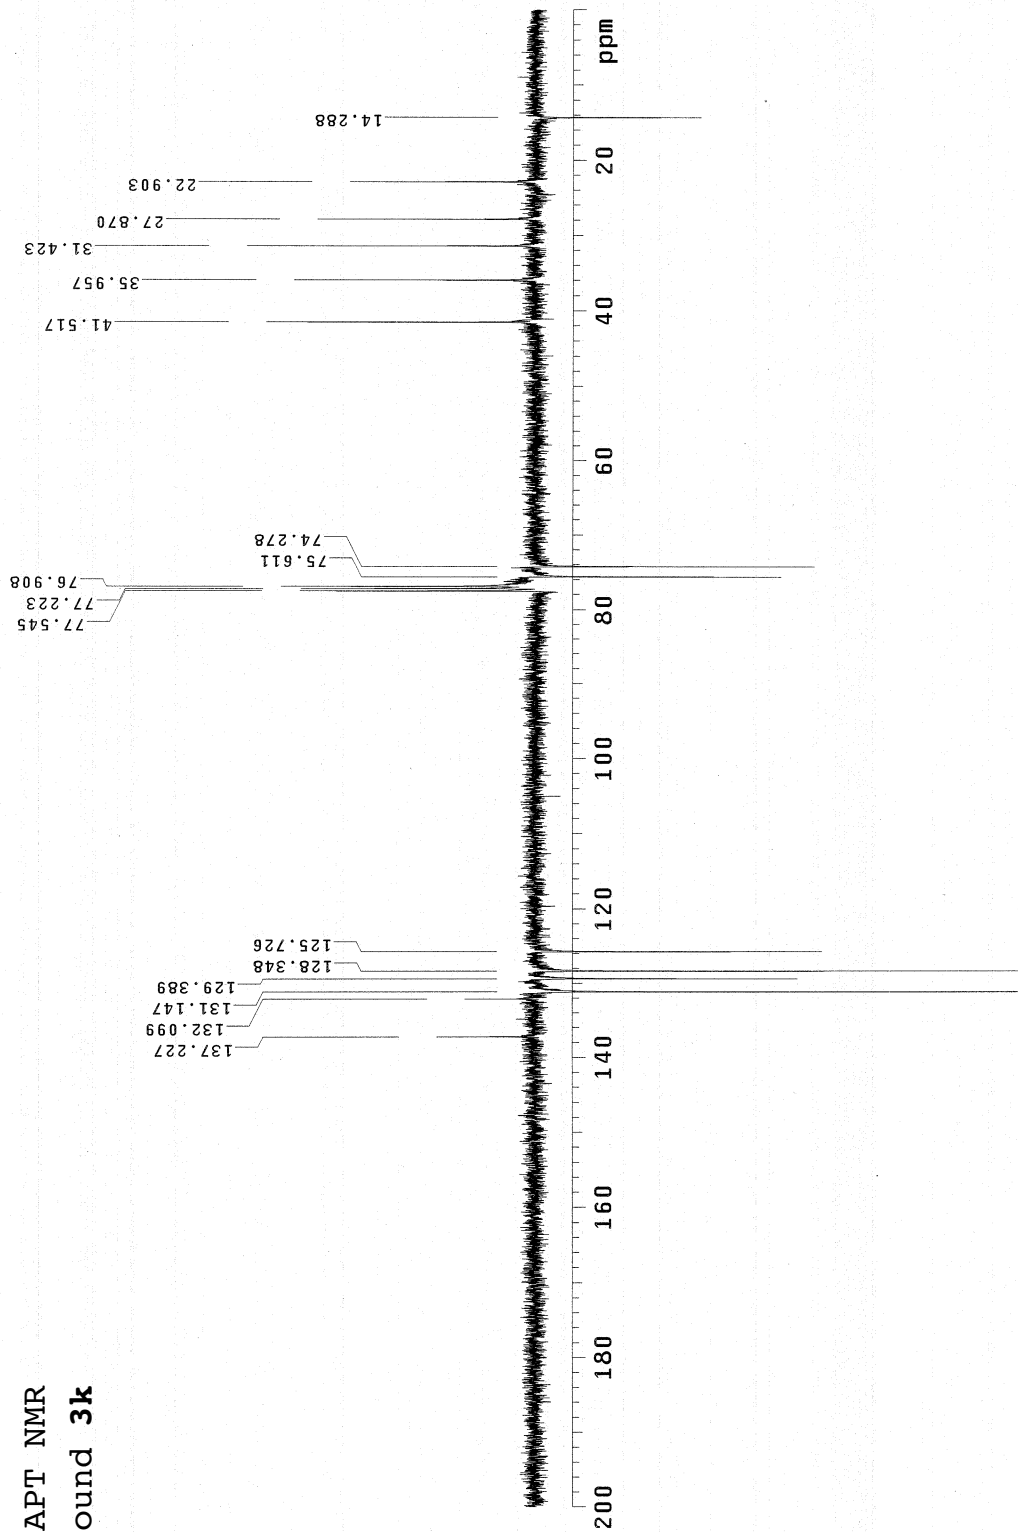

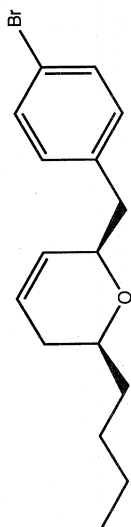

<sup>1</sup>H NMR

Compound **31**

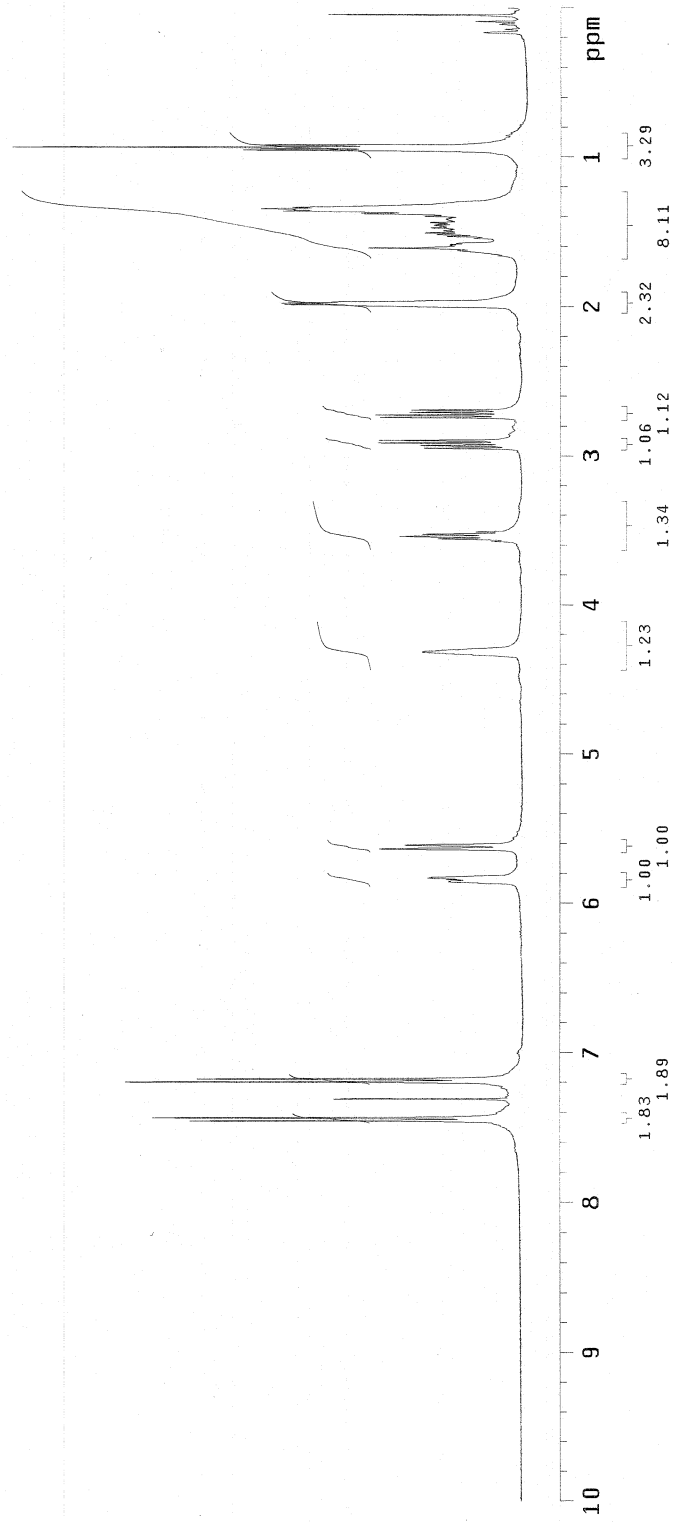



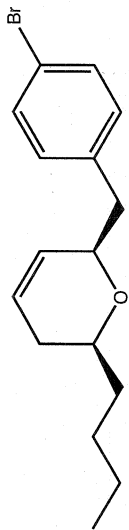

<sup>13</sup>CAPT NMR

Compound 31

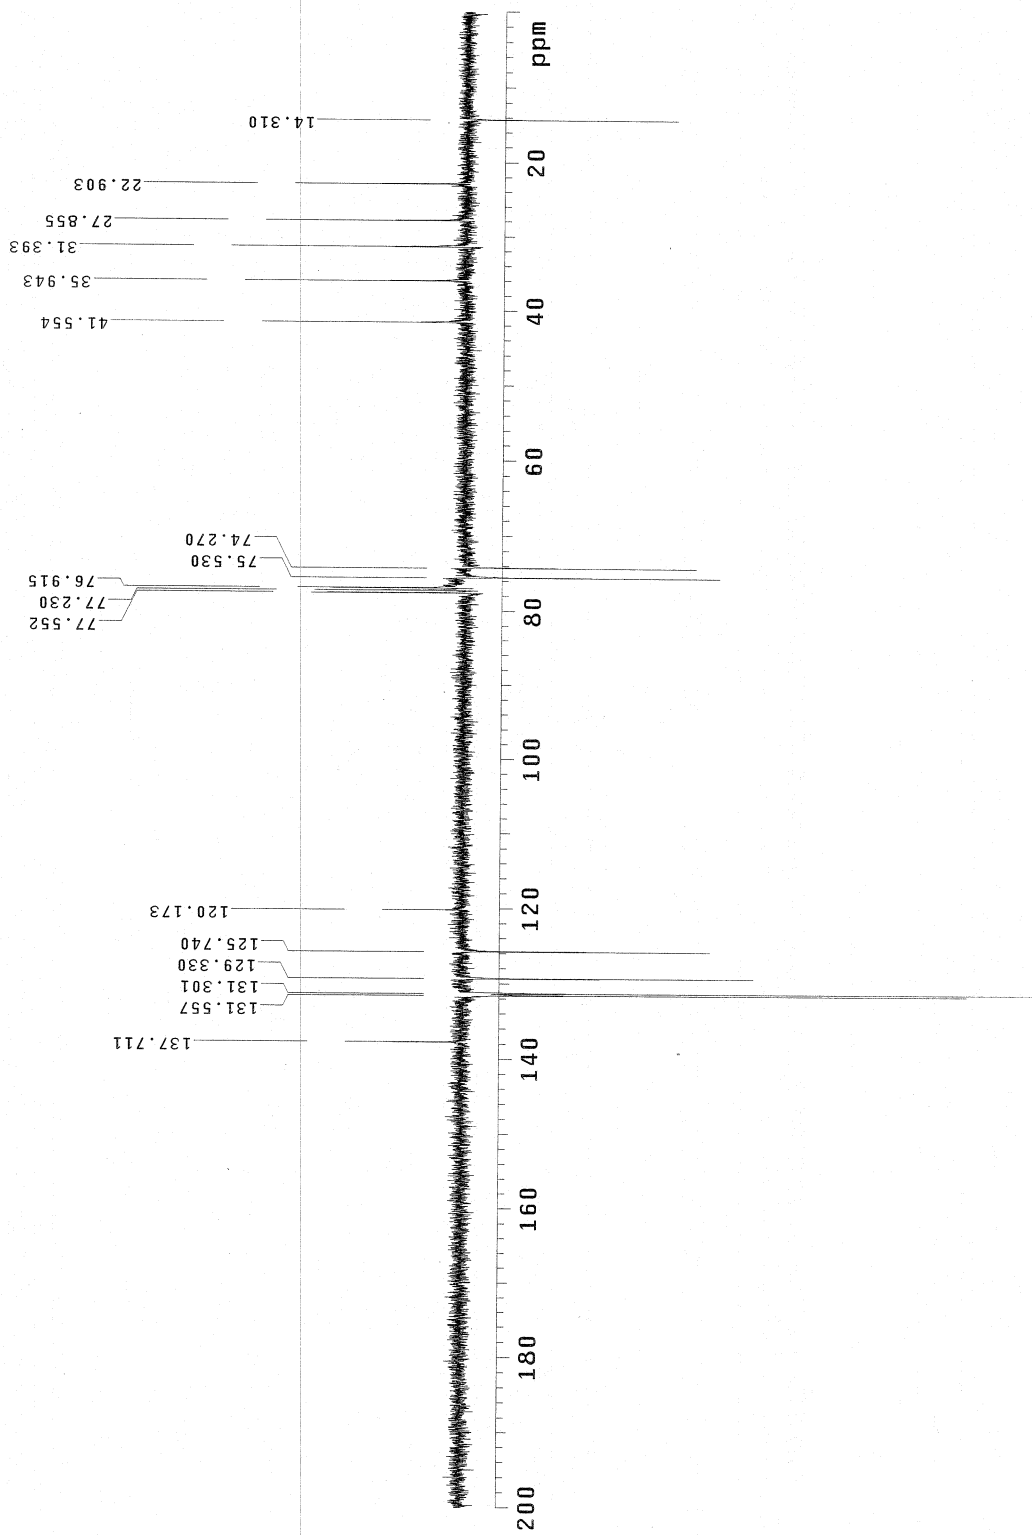

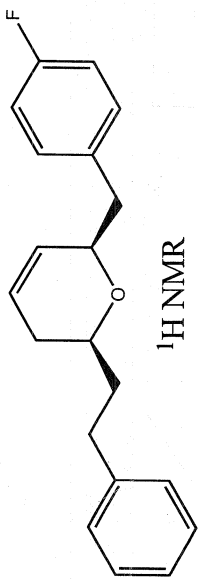

<sup>1</sup>H NMR

Compound **3m**

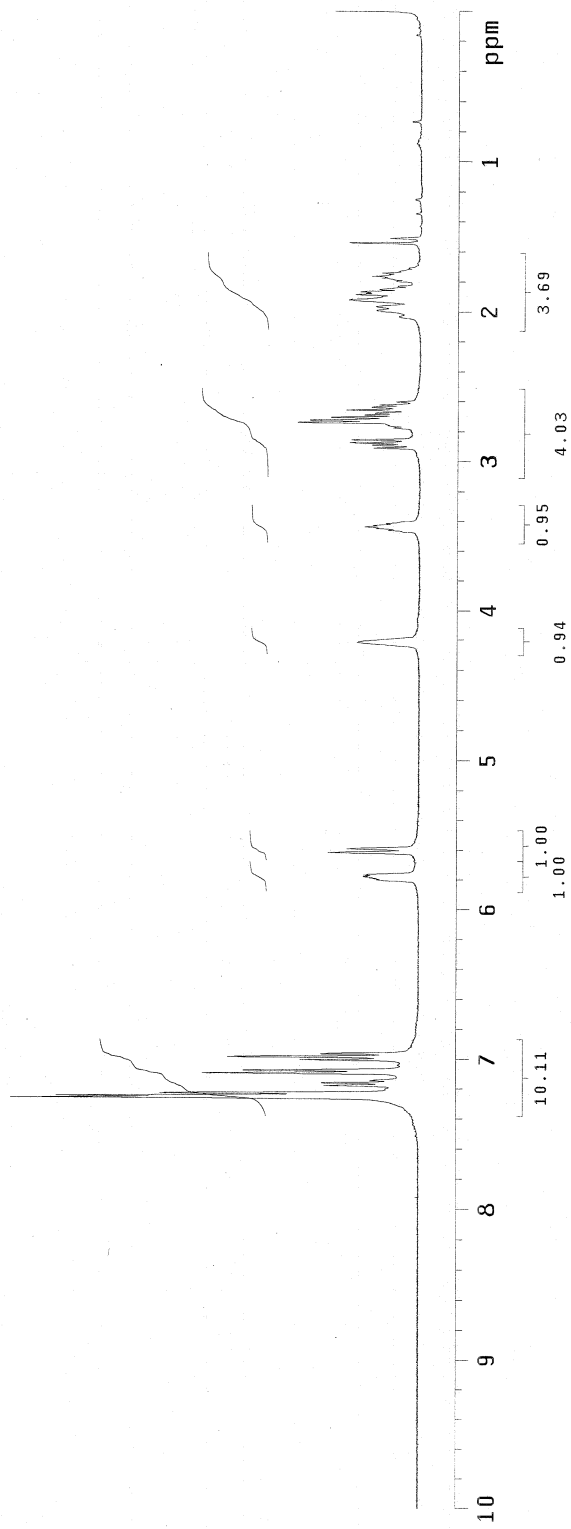

RFL-238; fluorophenyl oxirane with CH<sub>2</sub>CH<sub>2</sub>Ph side chain DHP; CDCl<sub>3</sub>;10/6/10

Automation directory:

Pulse Sequence: APT

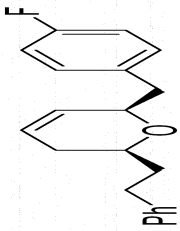

13C APT NMR  
Compound 3m

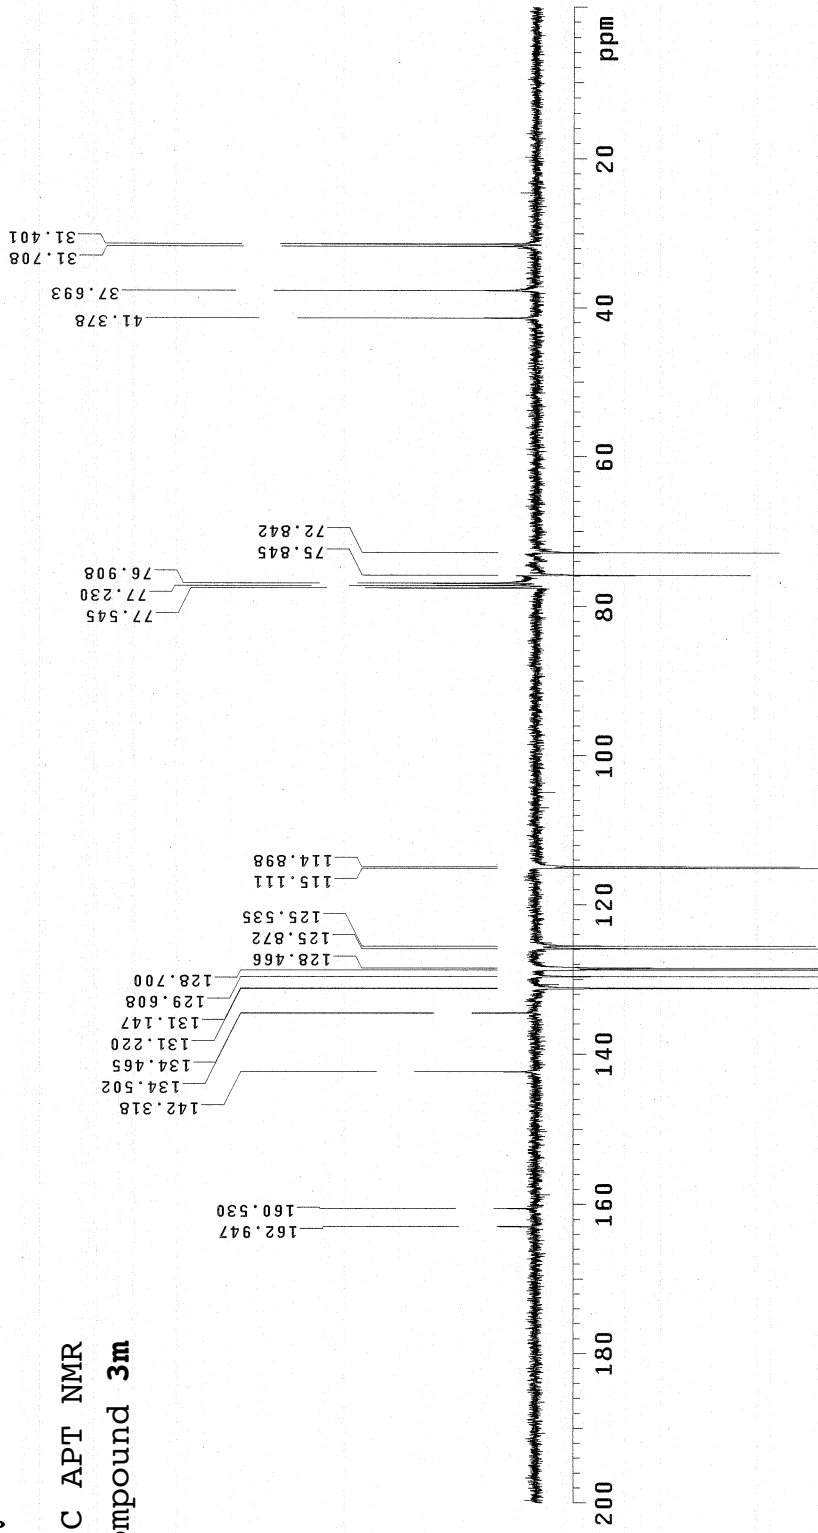

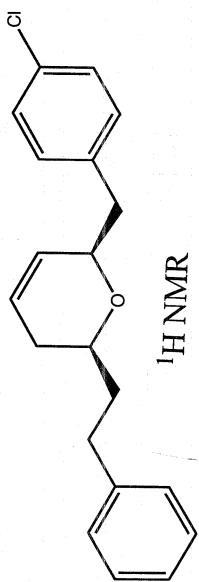

<sup>1</sup>H NMR  
Compound **3n**

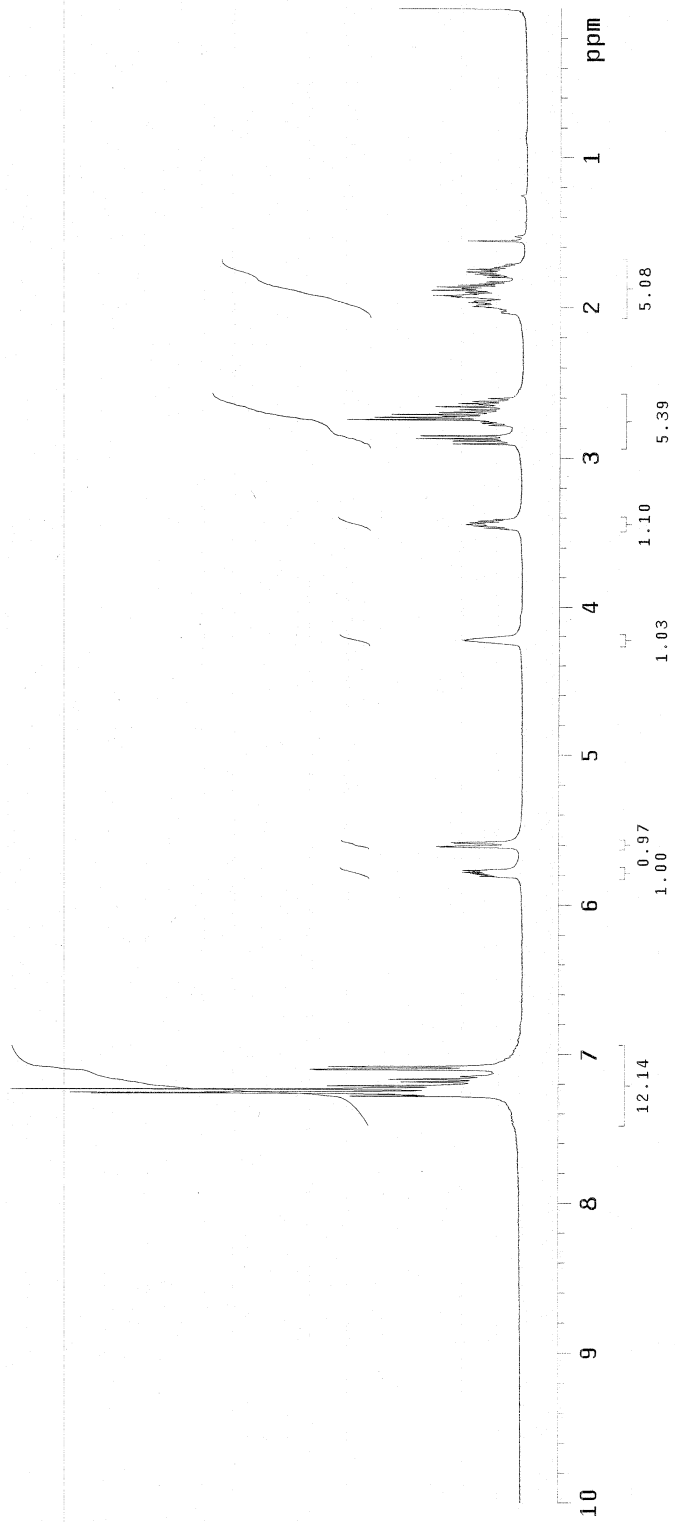

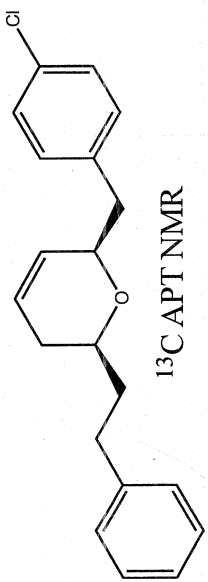

<sup>13</sup>C APT NMR

Compound 3n

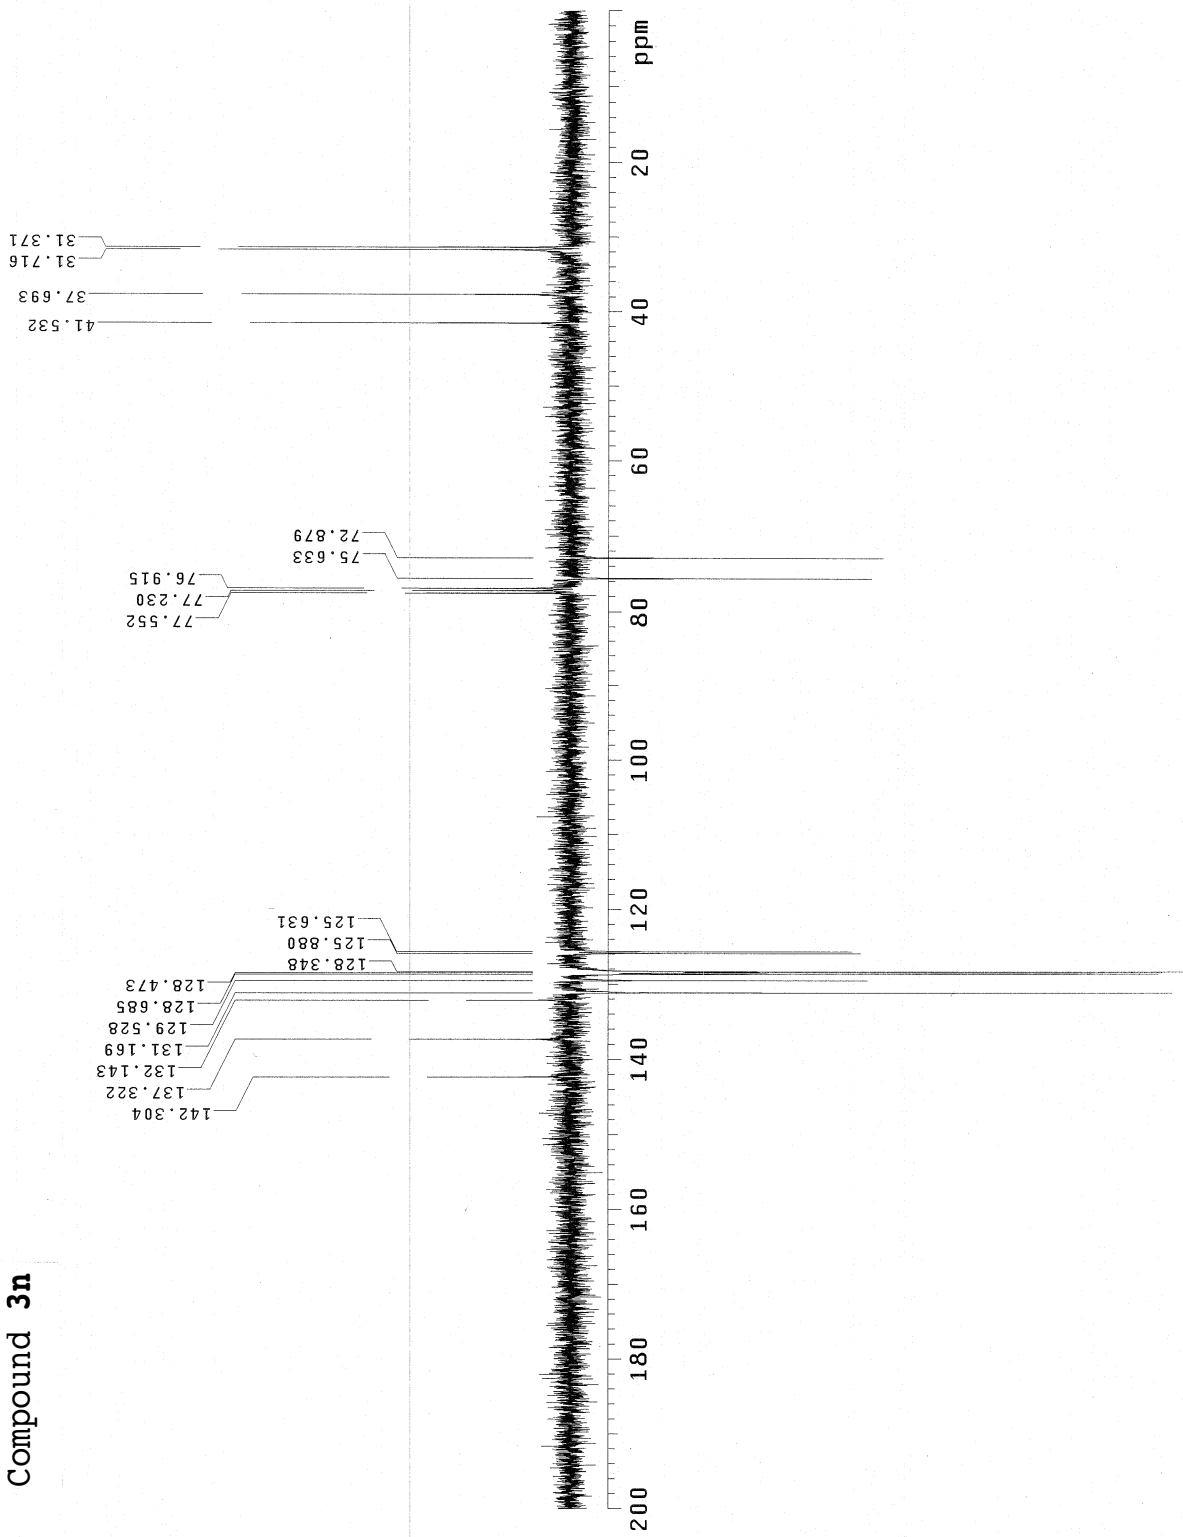

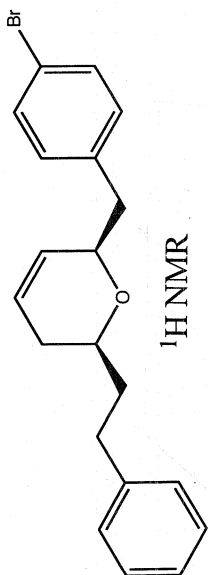

<sup>1</sup>H NMR

Compound **30**

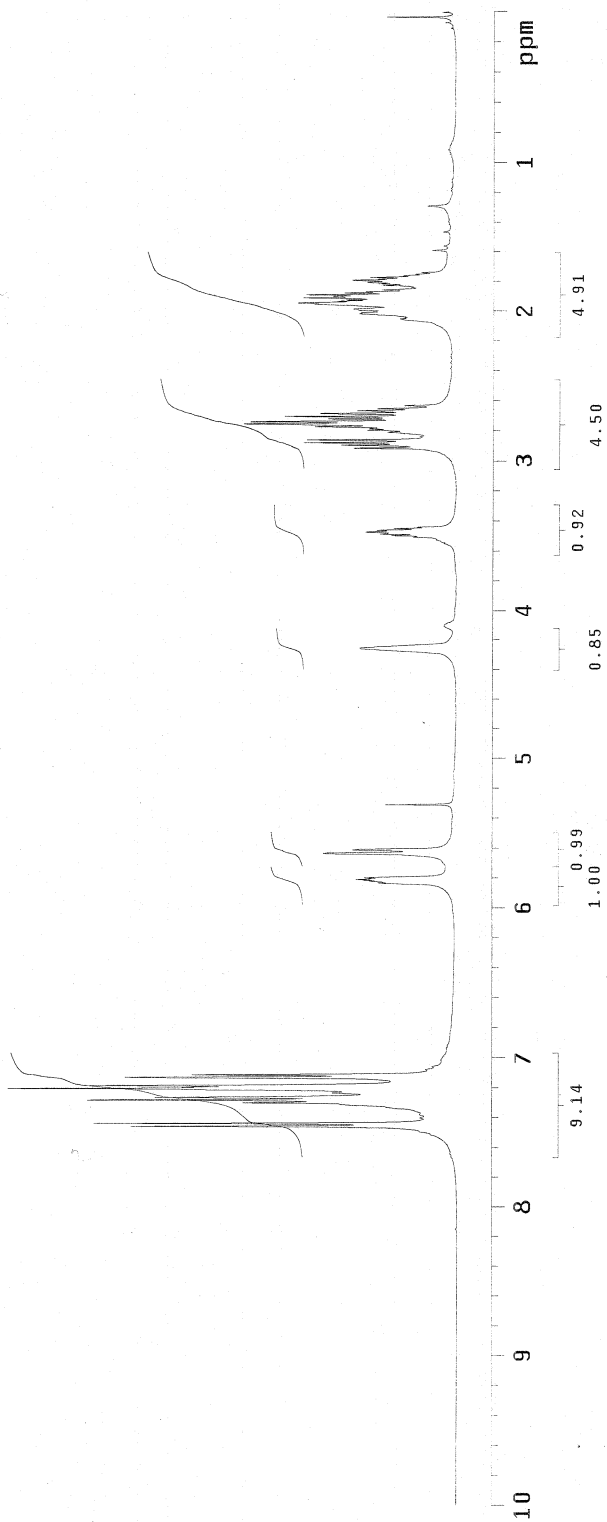

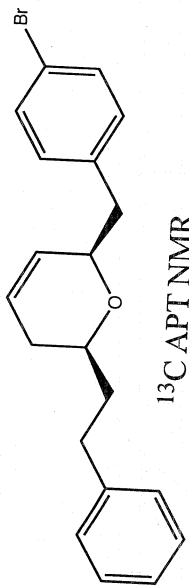

<sup>13</sup>C APT NMR

Compound 30

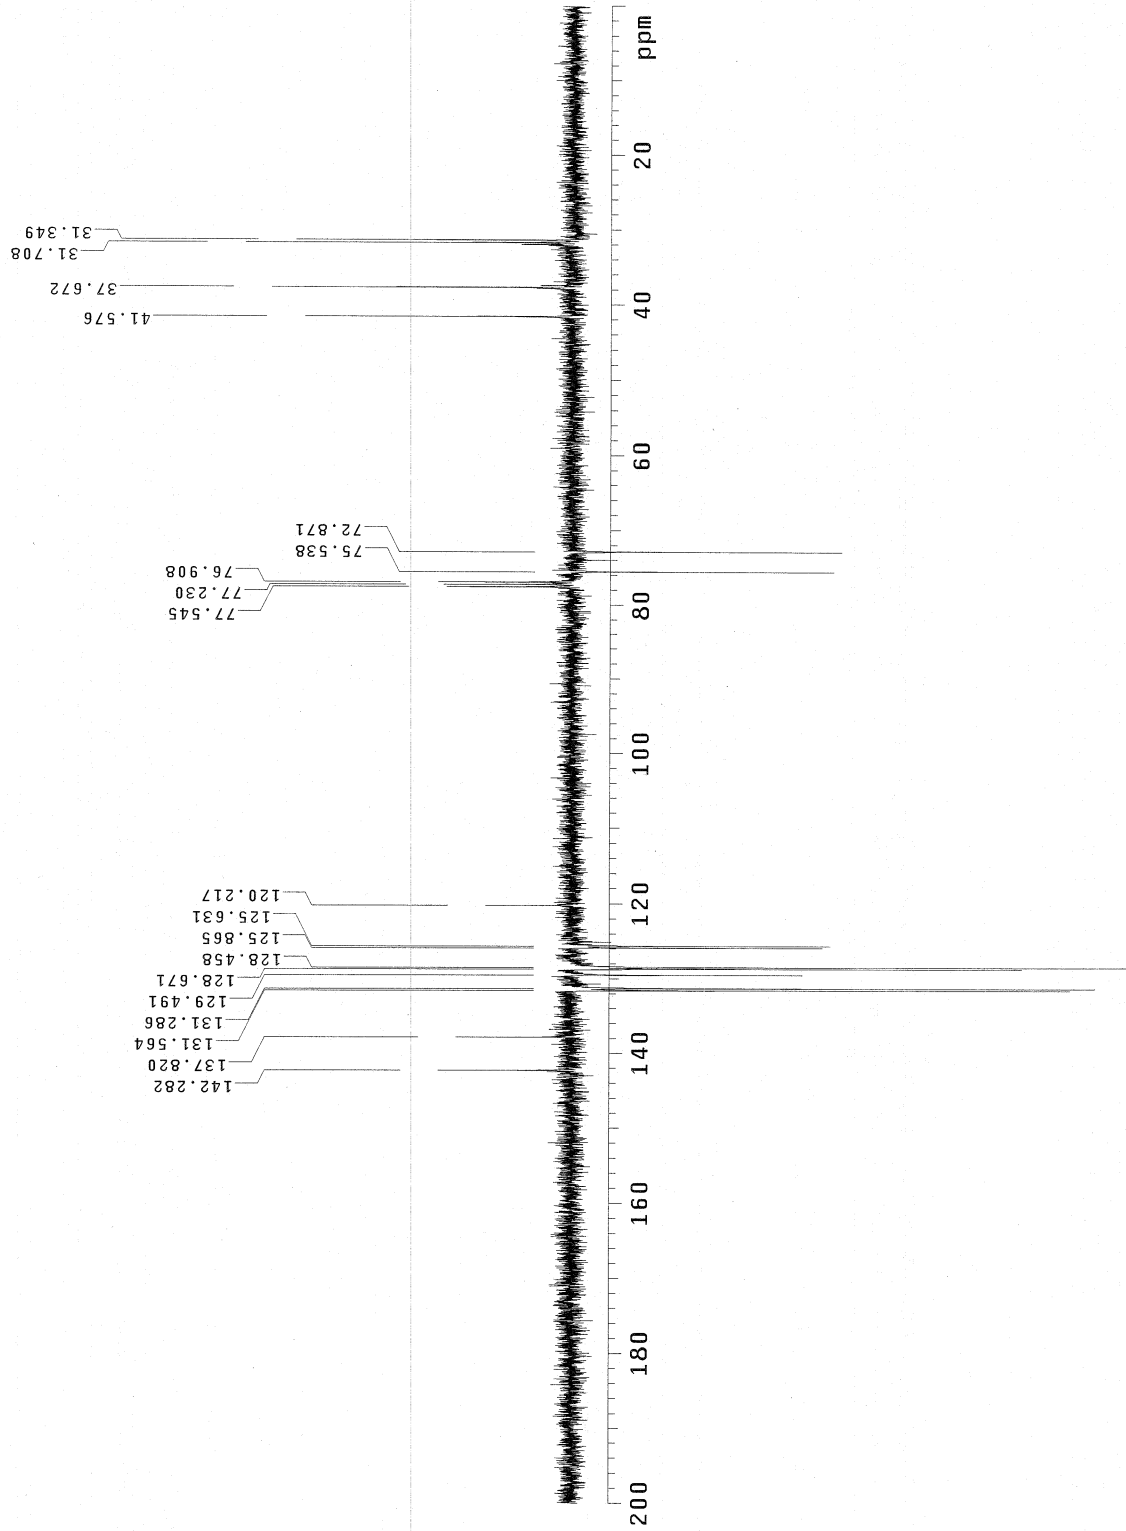

Table of  $^{19}\text{F}$  resonances for substrates and various triflate species.

| Substrate                                                                           | Catalyst                                             | $^{19}\text{F}$ Chemical Shifts ( in ppm) |
|-------------------------------------------------------------------------------------|------------------------------------------------------|-------------------------------------------|
| –                                                                                   | $\text{Bi}(\text{OTf})_3$                            | none                                      |
| –                                                                                   | TfOH                                                 | -76.3                                     |
| –                                                                                   | TMSOTf                                               | -77.4                                     |
| –                                                                                   | $\text{Bu}_4\text{NOTf}$                             | -78.7                                     |
| 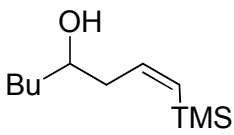   | 5% $\text{Bi}(\text{OTf})_3$                         | -78.8                                     |
|                                                                                     | 10% $\text{Bi}(\text{OTf})_3$                        | -78.8                                     |
|                                                                                     | 10% TfOH                                             | -78.8                                     |
|                                                                                     | 10% TMSOTf                                           | -78.8                                     |
|                                                                                     | 10% $\text{Bi}(\text{OTf})_3$ , 10% TfOH             | -78.8                                     |
|                                                                                     | 10% $\text{Bi}(\text{OTf})_3$ , 10% TfOH, 10% TMSOTf | -78.9                                     |
|   | 5% $\text{Bi}(\text{OTf})_3$                         | -78.0                                     |
|                                                                                     | 5% TfOH                                              | -78.7                                     |
|                                                                                     | 5% $\text{Bi}(\text{OTf})_3$ , 5% TfOH               | -78.1                                     |
|  | 10% $\text{Bi}(\text{OTf})_3$                        | -78.9                                     |
|                                                                                     | 10% $\text{Bi}(\text{OTf})_3$ , 10% TfOH             | -78.9                                     |
|  | 10% $\text{Bi}(\text{OTf})_3$                        | -78.8                                     |
|                                                                                     | 10% $\text{Bi}(\text{OTf})_3$ , 10% TfOH             | -78.7                                     |



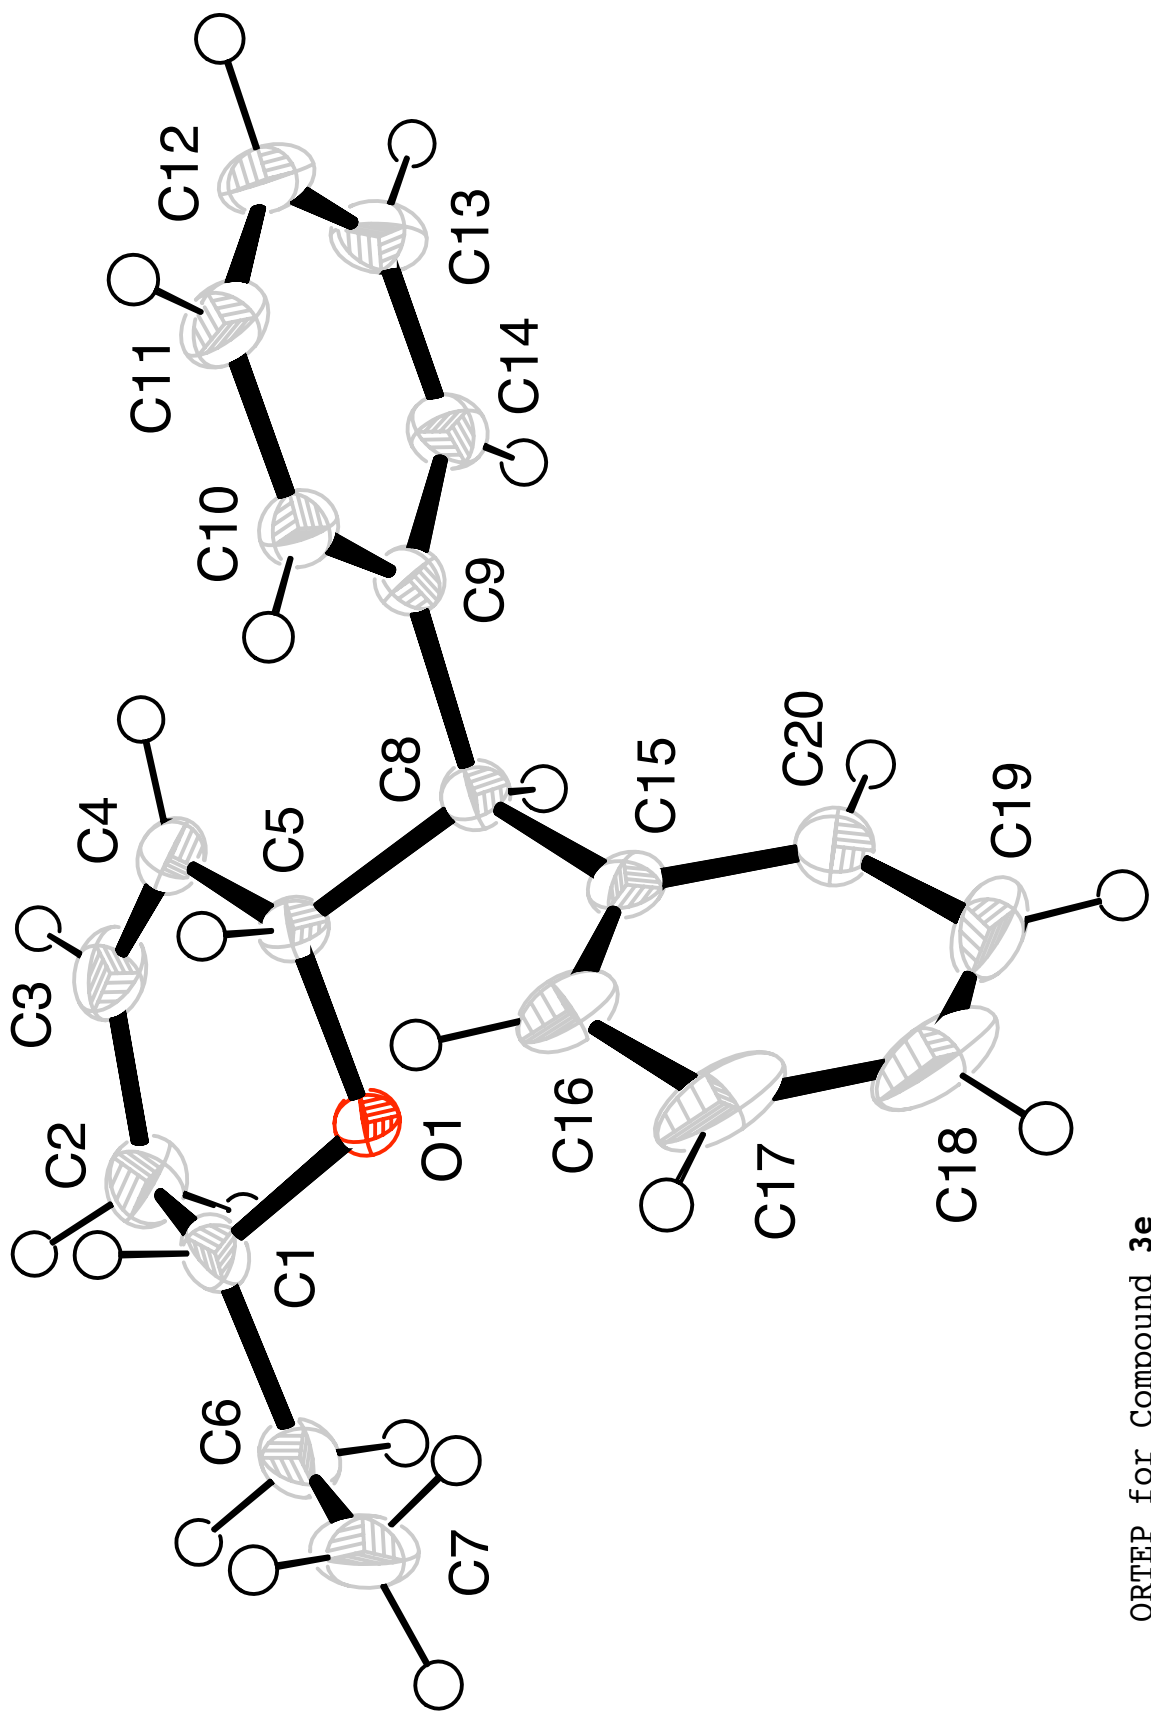

ORTEP for Compound **3e**

Table 1. Crystal data and structure refinement for **3e**.

|                                   |                                             |                    |
|-----------------------------------|---------------------------------------------|--------------------|
| Identification code               | cc                                          |                    |
| Empirical formula                 | C <sub>20</sub> H <sub>22</sub> O           |                    |
| Formula weight                    | 278.38                                      |                    |
| Temperature                       | 100(2) K                                    |                    |
| Wavelength                        | 1.54178 Å                                   |                    |
| Crystal system                    | Monoclinic                                  |                    |
| Space group                       | Cc                                          |                    |
| Unit cell dimensions              | a = 17.2161(3) Å                            | α = 90°.           |
|                                   | b = 5.95830(10) Å                           | β = 116.2110(10)°. |
|                                   | c = 17.2485(3) Å                            | γ = 90°.           |
| Volume                            | 1587.39(5) Å <sup>3</sup>                   |                    |
| Z                                 | 4                                           |                    |
| Density (calculated)              | 1.165 Mg/m <sup>3</sup>                     |                    |
| Absorption coefficient            | 0.533 mm <sup>-1</sup>                      |                    |
| F(000)                            | 600                                         |                    |
| Crystal size                      | 0.28 x 0.26 x 0.15 mm <sup>3</sup>          |                    |
| Theta range for data collection   | 5.72 to 66.90°.                             |                    |
| Index ranges                      | -18 ≤ h ≤ 20, -7 ≤ k ≤ 6, -19 ≤ l ≤ 20      |                    |
| Reflections collected             | 8161                                        |                    |
| Independent reflections           | 2425 [R(int) = 0.0308]                      |                    |
| Completeness to theta = 66.90°    | 99.6 %                                      |                    |
| Absorption correction             | Numerical                                   |                    |
| Max. and min. transmission        | 0.9233 and 0.8672                           |                    |
| Refinement method                 | Full-matrix least-squares on F <sup>2</sup> |                    |
| Data / restraints / parameters    | 2425 / 2 / 278                              |                    |
| Goodness-of-fit on F <sup>2</sup> | 1.043                                       |                    |
| Final R indices [I > 2σ(I)]       | R1 = 0.0283, wR2 = 0.0748                   |                    |
| R indices (all data)              | R1 = 0.0284, wR2 = 0.0749                   |                    |
| Absolute structure parameter      | 0.17(19)                                    |                    |
| Largest diff. peak and hole       | 0.110 and -0.156 e.Å <sup>-3</sup>          |                    |

Table 2. Atomic coordinates ( $\times 10^4$ ) and equivalent isotropic displacement parameters ( $\text{\AA}^2 \times 10^3$ ) for **3e**.  $U(\text{eq})$  is defined as one third of the trace of the orthogonalized  $U^{ij}$  tensor.

|       | x        | y        | z        | U(eq) |
|-------|----------|----------|----------|-------|
| O(1)  | 8475(1)  | 3003(2)  | 9174(1)  | 27(1) |
| C(1)  | 9164(1)  | 3297(3)  | 8929(1)  | 33(1) |
| C(2)  | 9070(1)  | 5572(3)  | 8505(1)  | 43(1) |
| C(3)  | 8161(1)  | 5953(3)  | 7851(1)  | 38(1) |
| C(4)  | 7512(1)  | 4697(2)  | 7812(1)  | 31(1) |
| C(5)  | 7652(1)  | 2817(2)  | 8448(1)  | 26(1) |
| C(6)  | 10010(1) | 3022(3)  | 9731(1)  | 39(1) |
| C(7)  | 10147(1) | 721(3)   | 10135(1) | 46(1) |
| C(8)  | 6971(1)  | 2796(2)  | 8794(1)  | 24(1) |
| C(9)  | 6070(1)  | 2480(2)  | 8058(1)  | 24(1) |
| C(10) | 5832(1)  | 512(2)   | 7570(1)  | 28(1) |
| C(11) | 5021(1)  | 322(3)   | 6866(1)  | 35(1) |
| C(12) | 4439(1)  | 2093(3)  | 6645(1)  | 37(1) |
| C(13) | 4661(1)  | 4030(3)  | 7132(1)  | 36(1) |
| C(14) | 5471(1)  | 4227(2)  | 7835(1)  | 30(1) |
| C(15) | 7181(1)  | 1102(2)  | 9522(1)  | 26(1) |
| C(16) | 7609(1)  | -907(2)  | 9567(1)  | 34(1) |
| C(17) | 7796(1)  | -2396(3) | 10245(1) | 48(1) |
| C(18) | 7549(1)  | -1933(4) | 10880(1) | 54(1) |
| C(19) | 7121(1)  | 57(4)    | 10851(1) | 54(1) |
| C(20) | 6941(1)  | 1593(3)  | 10173(1) | 36(1) |

Table 3. Bond lengths [ $\text{\AA}$ ] and angles [ $^\circ$ ] for **3e**.

---

|             |            |
|-------------|------------|
| O(1)-C(5)   | 1.4221(15) |
| O(1)-C(1)   | 1.4350(17) |
| C(1)-C(6)   | 1.511(2)   |
| C(1)-C(2)   | 1.514(2)   |
| C(1)-H(1)   | 1.024(18)  |
| C(2)-C(3)   | 1.488(2)   |
| C(2)-H(2A)  | 0.98(2)    |
| C(2)-H(2B)  | 0.99(2)    |
| C(3)-C(4)   | 1.322(2)   |
| C(3)-H(3)   | 0.95(2)    |
| C(4)-C(5)   | 1.5096(19) |
| C(4)-H(4)   | 0.97(2)    |
| C(5)-C(8)   | 1.5310(18) |
| C(5)-H(5)   | 1.051(16)  |
| C(6)-C(7)   | 1.508(3)   |
| C(6)-H(6A)  | 0.95(2)    |
| C(6)-H(6B)  | 1.007(19)  |
| C(7)-H(7A)  | 1.01(2)    |
| C(7)-H(7B)  | 0.99(2)    |
| C(7)-H(7C)  | 0.95(3)    |
| C(8)-C(9)   | 1.5214(18) |
| C(8)-C(15)  | 1.5251(17) |
| C(8)-H(8)   | 0.985(17)  |
| C(9)-C(10)  | 1.395(2)   |
| C(9)-C(14)  | 1.395(2)   |
| C(10)-C(11) | 1.393(2)   |
| C(10)-H(10) | 0.992(16)  |
| C(11)-C(12) | 1.387(2)   |
| C(11)-H(11) | 1.004(19)  |
| C(12)-C(13) | 1.379(2)   |
| C(12)-H(12) | 0.952(19)  |
| C(13)-C(14) | 1.391(2)   |
| C(13)-H(13) | 0.974(19)  |
| C(14)-H(14) | 0.98(2)    |

|             |           |
|-------------|-----------|
| C(15)-C(16) | 1.389(2)  |
| C(15)-C(20) | 1.389(2)  |
| C(16)-C(17) | 1.389(2)  |
| C(16)-H(16) | 0.984(19) |
| C(17)-C(18) | 1.365(3)  |
| C(17)-H(17) | 1.07(2)   |
| C(18)-C(19) | 1.385(3)  |
| C(18)-H(18) | 0.97(3)   |
| C(19)-C(20) | 1.408(3)  |
| C(19)-H(19) | 0.89(3)   |
| C(20)-H(20) | 0.963(19) |

|                  |            |
|------------------|------------|
| C(5)-O(1)-C(1)   | 112.43(9)  |
| O(1)-C(1)-C(6)   | 107.72(11) |
| O(1)-C(1)-C(2)   | 109.01(13) |
| C(6)-C(1)-C(2)   | 113.16(13) |
| O(1)-C(1)-H(1)   | 109.8(11)  |
| C(6)-C(1)-H(1)   | 108.0(11)  |
| C(2)-C(1)-H(1)   | 109.1(10)  |
| C(3)-C(2)-C(1)   | 110.77(13) |
| C(3)-C(2)-H(2A)  | 112.4(12)  |
| C(1)-C(2)-H(2A)  | 107.3(12)  |
| C(3)-C(2)-H(2B)  | 112.4(14)  |
| C(1)-C(2)-H(2B)  | 107.6(12)  |
| H(2A)-C(2)-H(2B) | 106.1(18)  |
| C(4)-C(3)-C(2)   | 122.32(14) |
| C(4)-C(3)-H(3)   | 121.4(14)  |
| C(2)-C(3)-H(3)   | 116.3(13)  |
| C(3)-C(4)-C(5)   | 121.54(14) |
| C(3)-C(4)-H(4)   | 123.2(11)  |
| C(5)-C(4)-H(4)   | 115.2(11)  |
| O(1)-C(5)-C(4)   | 111.06(11) |
| O(1)-C(5)-C(8)   | 107.06(10) |
| C(4)-C(5)-C(8)   | 112.62(11) |
| O(1)-C(5)-H(5)   | 108.1(9)   |
| C(4)-C(5)-H(5)   | 108.5(8)   |

|                   |            |
|-------------------|------------|
| C(8)-C(5)-H(5)    | 109.3(9)   |
| C(7)-C(6)-C(1)    | 114.37(14) |
| C(7)-C(6)-H(6A)   | 111.8(11)  |
| C(1)-C(6)-H(6A)   | 104.4(12)  |
| C(7)-C(6)-H(6B)   | 110.3(10)  |
| C(1)-C(6)-H(6B)   | 107.4(10)  |
| H(6A)-C(6)-H(6B)  | 108.3(15)  |
| C(6)-C(7)-H(7A)   | 112.2(13)  |
| C(6)-C(7)-H(7B)   | 112.7(13)  |
| H(7A)-C(7)-H(7B)  | 107.3(18)  |
| C(6)-C(7)-H(7C)   | 112.9(15)  |
| H(7A)-C(7)-H(7C)  | 110(2)     |
| H(7B)-C(7)-H(7C)  | 101(2)     |
| C(9)-C(8)-C(15)   | 112.83(10) |
| C(9)-C(8)-C(5)    | 110.50(10) |
| C(15)-C(8)-C(5)   | 112.49(11) |
| C(9)-C(8)-H(8)    | 107.2(10)  |
| C(15)-C(8)-H(8)   | 107.6(9)   |
| C(5)-C(8)-H(8)    | 105.9(10)  |
| C(10)-C(9)-C(14)  | 118.49(13) |
| C(10)-C(9)-C(8)   | 121.76(11) |
| C(14)-C(9)-C(8)   | 119.69(12) |
| C(11)-C(10)-C(9)  | 120.55(13) |
| C(11)-C(10)-H(10) | 119.1(9)   |
| C(9)-C(10)-H(10)  | 120.4(9)   |
| C(12)-C(11)-C(10) | 120.12(14) |
| C(12)-C(11)-H(11) | 119.0(11)  |
| C(10)-C(11)-H(11) | 120.9(11)  |
| C(13)-C(12)-C(11) | 119.85(14) |
| C(13)-C(12)-H(12) | 119.7(10)  |
| C(11)-C(12)-H(12) | 120.4(10)  |
| C(12)-C(13)-C(14) | 120.18(14) |
| C(12)-C(13)-H(13) | 122.0(11)  |
| C(14)-C(13)-H(13) | 117.8(11)  |
| C(13)-C(14)-C(9)  | 120.79(13) |
| C(13)-C(14)-H(14) | 118.8(11)  |

|                   |            |
|-------------------|------------|
| C(9)-C(14)-H(14)  | 120.4(11)  |
| C(16)-C(15)-C(20) | 118.42(13) |
| C(16)-C(15)-C(8)  | 122.91(12) |
| C(20)-C(15)-C(8)  | 118.67(13) |
| C(15)-C(16)-C(17) | 121.15(16) |
| C(15)-C(16)-H(16) | 120.4(11)  |
| C(17)-C(16)-H(16) | 118.4(11)  |
| C(18)-C(17)-C(16) | 120.54(19) |
| C(18)-C(17)-H(17) | 120.8(13)  |
| C(16)-C(17)-H(17) | 118.6(13)  |
| C(17)-C(18)-C(19) | 119.55(16) |
| C(17)-C(18)-H(18) | 118.5(14)  |
| C(19)-C(18)-H(18) | 121.9(14)  |
| C(18)-C(19)-C(20) | 120.29(18) |
| C(18)-C(19)-H(19) | 122.2(15)  |
| C(20)-C(19)-H(19) | 117.5(15)  |
| C(15)-C(20)-C(19) | 120.04(17) |
| C(15)-C(20)-H(20) | 119.0(11)  |
| C(19)-C(20)-H(20) | 121.0(11)  |

---

Symmetry transformations used to generate equivalent atoms:

Table 4. Anisotropic displacement parameters ( $\text{\AA}^2 \times 10^3$ ) for **3e**. The anisotropic displacement factor exponent takes the form:  $-2\pi^2 [ h^2 a^{*2} U^{11} + \dots + 2 h k a^* b^* U^{12} ]$

|       | U <sup>11</sup> | U <sup>22</sup> | U <sup>33</sup> | U <sup>23</sup> | U <sup>13</sup> | U <sup>12</sup> |
|-------|-----------------|-----------------|-----------------|-----------------|-----------------|-----------------|
| O(1)  | 19(1)           | 41(1)           | 20(1)           | -4(1)           | 8(1)            | -5(1)           |
| C(1)  | 24(1)           | 51(1)           | 28(1)           | -12(1)          | 14(1)           | -9(1)           |
| C(2)  | 36(1)           | 61(1)           | 36(1)           | -2(1)           | 19(1)           | -19(1)          |
| C(3)  | 43(1)           | 46(1)           | 28(1)           | 0(1)            | 19(1)           | -12(1)          |
| C(4)  | 29(1)           | 42(1)           | 22(1)           | 0(1)            | 11(1)           | -3(1)           |
| C(5)  | 19(1)           | 35(1)           | 21(1)           | -3(1)           | 7(1)            | -4(1)           |
| C(6)  | 23(1)           | 59(1)           | 35(1)           | -13(1)          | 13(1)           | -8(1)           |
| C(7)  | 24(1)           | 59(1)           | 45(1)           | -12(1)          | 5(1)            | 4(1)            |
| C(8)  | 23(1)           | 26(1)           | 23(1)           | -2(1)           | 10(1)           | -3(1)           |
| C(9)  | 21(1)           | 31(1)           | 23(1)           | 2(1)            | 10(1)           | -4(1)           |
| C(10) | 26(1)           | 32(1)           | 25(1)           | 2(1)            | 10(1)           | -3(1)           |
| C(11) | 33(1)           | 43(1)           | 25(1)           | -1(1)           | 9(1)            | -13(1)          |
| C(12) | 23(1)           | 54(1)           | 27(1)           | 11(1)           | 3(1)            | -9(1)           |
| C(13) | 24(1)           | 42(1)           | 39(1)           | 14(1)           | 11(1)           | 4(1)            |
| C(14) | 26(1)           | 33(1)           | 32(1)           | 4(1)            | 14(1)           | -2(1)           |
| C(15) | 18(1)           | 36(1)           | 21(1)           | -1(1)           | 4(1)            | -10(1)          |
| C(16) | 31(1)           | 31(1)           | 26(1)           | 0(1)            | 1(1)            | -6(1)           |
| C(17) | 41(1)           | 41(1)           | 32(1)           | 6(1)            | -10(1)          | -15(1)          |
| C(18) | 42(1)           | 62(1)           | 31(1)           | 18(1)           | -8(1)           | -26(1)          |
| C(19) | 37(1)           | 101(2)          | 20(1)           | -2(1)           | 9(1)            | -36(1)          |
| C(20) | 23(1)           | 57(1)           | 26(1)           | -5(1)           | 10(1)           | -12(1)          |



Table 5. Hydrogen coordinates ( $\times 10^4$ ) and isotropic displacement parameters ( $\text{\AA}^2 \times 10^3$ ) for **3e**.

|       | x         | y         | z         | U(eq) |
|-------|-----------|-----------|-----------|-------|
| H(1)  | 9131(13)  | 2070(30)  | 8499(12)  | 34(4) |
| H(2A) | 9478(15)  | 5620(30)  | 8253(13)  | 55(6) |
| H(2B) | 9269(16)  | 6710(40)  | 8967(15)  | 54(5) |
| H(3)  | 8073(14)  | 7120(40)  | 7447(14)  | 47(5) |
| H(4)  | 6925(12)  | 4860(30)  | 7369(13)  | 36(4) |
| H(5)  | 7631(10)  | 1280(30)  | 8138(10)  | 23(4) |
| H(6A) | 9995(13)  | 4150(30)  | 10112(13) | 38(4) |
| H(6B) | 10489(12) | 3390(30)  | 9569(11)  | 33(4) |
| H(7A) | 10681(16) | 650(40)   | 10711(15) | 56(6) |
| H(7B) | 9651(16)  | 220(40)   | 10233(15) | 55(6) |
| H(7C) | 10165(17) | -430(40)  | 9760(17)  | 68(7) |
| H(8)  | 6989(11)  | 4300(30)  | 9036(10)  | 28(4) |
| H(10) | 6238(11)  | -780(30)  | 7723(10)  | 24(4) |
| H(11) | 4855(12)  | -1070(30) | 6500(12)  | 38(4) |
| H(12) | 3880(12)  | 1960(30)  | 6172(12)  | 33(4) |
| H(13) | 4259(12)  | 5280(30)  | 7011(12)  | 33(4) |
| H(14) | 5610(12)  | 5610(30)  | 8182(12)  | 39(5) |
| H(16) | 7800(12)  | -1290(30) | 9122(12)  | 38(5) |
| H(17) | 8117(15)  | -3940(40) | 10249(15) | 58(6) |
| H(18) | 7700(16)  | -2990(40) | 11351(16) | 63(6) |
| H(19) | 6934(16)  | 400(40)   | 11243(17) | 59(6) |
| H(20) | 6644(13)  | 2980(30)  | 10147(12) | 37(4) |
